# Supplementary material
Source: Preprints.org preprint supplement (doi:10.20944/preprints202108.0095.v1)
Supplement: Supplementary file 1 [file supplementary]

## Sheet: Sheet1
Superclass	Genus	name	Family	Length (bp)	ORF(aa)	copy number (>80% identity and > 1000 bp)	copy number of intact Tns	Size(bp) Left/Right	Identity	TIR end (5 bp)	Catalyticmotif	TSD	gb	Representativesequence	Consensus sequence
Apidae	Apis	Apis cerana	Tc1	1127	340	8	×	？	？	？	DD34D	TA	WJBF01000005.1:6339654-6340784	ATAGTATATATATATTTTATTTAATTACATATTGACCATTATGATCTAATACATATTGCCATCTTTTA GGTAATAGCATGATTCCACGTTCATAGAATTTCTGATCTTTGTTTGCAAAAAACTGATCCAAGTAGTTTT TGACATCCTCATTTGAAGTAAATGTTTTATCATTTAAAGAATTCTGTAAAGATCGAAATAAGTGGTAATC TGAAGGTGCCAGATCGGGCGAATATGGTGGATGTGGTAGCACTTCCCATCCAAGCTGTAACAACTTCTGG CGAGTCATTAAGCTCATATGAGCTTTAGCATTATCATGATGAAAAACTACACCTTTCCTATTAATTAATT CAGGTCTTTTTTGTTTGATGGAATTGTTTAATTTATCCAATTGATT…	×
Apidae	Apis	Apis cerana cerana	Tc1	1127	340	4	×	？	？	？	DD34D	TA	WJBF01000005.1:6339654-6340784	ATAGTATATATATATTTTATTTAATTACATATTGACCATTATGATCTAATACATATTGCCATCTTTTA GGTAATAGCATGATTCCACGTTCATAGAATTTCTGATCTTTGTTTGCAAAAAACTGATCCAAGTAGTTTT TGACATCCTCATTTGAAGTAAATGTTTTATCATTTAAAGAATTCTGTAAAGATCGAAATAAGTGGTAATC TGAAGGTGCCAGATCGGGCGAATATGGTGGATGTGGTAGCACTTCCCATCCAAGCTGTAACAACTTCTGG CGAGTCATTAAGCTCATATGAGCTTTAGCATTATCATGATGAAAAACTACACCTTTCCTATTAATTAATT CAGGTCTTTTTTGTTTGATGGAATTGTTTAATTTATCCAATTGATT…	×
Apidae	Apis	Apis cerana japonica	Tc1	1127	340	2	×	？	？	？	DD34D	TA	BDUG01002956.1:15724-16854	ATACGTATTATATATTTTGAGAGTTGACATTTCATTGTTTATTTATAAAAAAAATTCATTTAATTCTA TTCGGTTGTATTTTTCGTGTATGATAACAAAGATGCAAGACCAAAAGGAGCATTTTCGGCATATTTTACT TTTTTATTATCGAAAAGGTAAAAATGCTGTTCAGGCAAGAAAAAAGTTATGTGAAATTTATGGAGAAGGT ATTTTAACAGTACGCCAGTGTCAAAACTGGTTTTCAAAATTTCGTTCCGATAATTTTGACATTAAAGATG CGCCACGTTCTGGAAGACCAGTTGAAGCTGATGAAGACAAAATAAAGGCACTGATTGAAGCAAACCGACG AATAACAACTCGAGAAATTGCTACGAGATTGAATTTGTCGAATTCG…	×
Apidae	Apis	Apis dorsata	Tc1	1127	336	10	×	？	？	？	DD34D	TA	WJNQ01000562.1:33124-34254	ATATGTATTATATATTTGGAAAATTGACATTTCATCGTTTATTTGTAAAAAAAATTCATTTGATTCTA TTCGGTTATATTTTTCGTGTGTGATAATAAAGATGCAAGACCAAAAGGAACATTTTCGGCATATTTTACT TTTTTATTATCGAAAAGGTAAAAATGCTGTTCAGGCAAGAAAAAAGTTATGTGAAATTTATGGAGAAGAT ATATTAACAGTACGCCAGTGTCAAAACTGGTTTTCAAAATTTCGTTCTGACAATTTTGACATTAAAGATG CGCCACGTTCTGGAAGACCAGTTGAAGCTGATGAAGACAAAATAAAGGCACTGATTGAAGCAAATCGACG AATAACAACTCGAGAAATTGCTATGAGATTGAATTTGTCGAATTCA…	×
Apidae	Apis	Apis dorsata	Tc1	1329	100<	2	×	27/27	0.81	AAGGA/AAGGG	DD41D	TA	WJNQ01000011.1:189849-191181	AAGGGTGTCCCAAAATTCACAAGATTTGAATTTTGCACCATTTGTGCGCAAATATTGCTAACAAAAAA AAAAACAGCGTGACAGCTGATAGTTCAGGATTATTAAAAATAAAGCGCTACACGAAAAAACAACGCGTTA TTGTTGAACAATAAAAAAAAATAAAAATAATGAAGAAATAGCAGTTTGCAATTTTCGGATAAAATATGGT CAGAATAATGATTTAACTTCAACAACTGAAGAGATTAATTTAAAAATTTAGGGAGACAGAACCAATTAGT GATCTTAAGCATTCTGGCCTTCTTTCGACAAGTCATTCAACACAAAACATCGAAGTAGTTTGTGAGAATG TTGCTGAGAATTCAAGGATATCAATCCGGCACCGTGATTAAGAATT…	×
Apidae	Apis	Apis florea	Tc1	1134	337	7	×	？	？	？	DD34D	TA	AEKZ01005335.1:1895-3032	AACCGTGTTGTTATTATATTTTGAGAGTTAGCATTTCATGGTTTATTTATAAGAAAAATTCGTTTCAT TCTGTGTAGTTGTGTTTTTCGTGTGTGATAACAAAGATGCAAGATCAAAAGGAGCATTTTCGGCATATTT TACTTTTTTATTACCGAAAAGGTAAGAATGCTGTTCAGGCAAGAAAAAAGTTATGTGAAATCTATGGAGA AAGTGTATTAACAGTACGCCAGTGTCAAAATTGGTTTTCAAAATTTCGTTCCGACAATTTTGACATTAAA GATGCGCCACGTTCTGGAAGACCAGTTGAAGCTGATGAAGACAAAATAAAGGCACTAATTGAAGCAAACC GACGAATAACAACTCGAGAAATTGCTACGAGATTGAATTTGTCAAA…	×
Apidae	Apis	Apis laboriosa	Tc1	1124	336	7	×	？	？	？	DD34D	TA	JACEOM010000106.1:764686-765813	ATAGCATATATGTATTTTATTTAATTACATATTGACCATTGTGATCTAATACATATTGCCATCTTTTA GGTAGTAGCATGATTCCACGTTCATAGAACTTTTGATCTTTGTTTGCAAAAAACTGATCTAAGTAATTTT TGACATCCTCATTTGAAGTAAATGTTTTATCATCTAAAGAATTCTGTAAAGATCGAAACAAGTGATAATC TGAAGGTGCCAAATCTGGCGAATATGGTGGATGCGGTAGCACCTCCCATCCAAACTGTAACAATTTCTGG CGAGTCATTAAGCTCATATGAGGTTTAGTATTATCATGATGAAACACTACACCTTTCCTATTAATTAATT CAGGTCTCTTTTGTTTGATAGAATTGTTTAATTTGTCCAATTGATT…	×
Apidae	Apis	Apis laboriosa	Tc1	1265	112	1	×	26/26	0.9231	AAGGA/AAGGG	DD41D	TA	JACEOM010000032.1:1932675-1933939	AAGGATGTCCCAAAATTCACGCAAGATTTGAATTTTGCACCATTTGTGCGCAAATATTGCCAACAAAAAAAACAGCGTGAAAGCTGATAGTTCAGGATTATTGAAAATGAAGCGCTACACGAAAAAACACGTTTTCATTGTTGAGCAATAAAAATAATGAAAGTTTGACAGTTTGCAATTTTCGTATAAAATATGATCAGAATAATGATTTAACTTCAACAACTGAAGAGATTAATTAAAAAATTTAGGGAGACAGAACCAATTAGTGATCTTAAGCACTTTGGCCTTCGACAATTCATTCAATACAAAACATCGAAGTAGTTTGTGAGAGTGTTGCTGAGAATCCAAGGATATCAATTTGGCATGTGATTATGAATTGGACATTTCGAAAAGCTCTCT…	×
Apidae	Apis	Apis mellifera	Tc1	1282	354	203	14	30/30	1	TTGGG/TTGGG	DD34D	TA	QIUM02000036.1:6433591-6434874	TTGGGTTGGCAACTAAGTAATTGCGGATTTCACTCATAGATGGCTTCAGTTGAATTTTTAGGTTTGCTGG CGTAGTCCAAATGTAAAACACATTTTGTTATTTGATAGTTGGCAATTCAGCTGTCAATCAGTAAAAAAAG TTTTTTGATCGGTTGCGTAGTTTTCGTTTGGCGTTCGTTGAAAAATGGAAAATCAAAAGGAACATTATCG TCGTATTTTGCTTTTTTATTTTCGCAAAGGGAAAAACGCATCGCAAGCTCACAAAAAGTTACGTGCTGTT TATGGCGACGAAGGCTTAAAAGAACGGCAGTGTCAAAATTGGTTTGACAAATTTCGTTCTGGTGATTTTT CACTCAAAGACGAAAAATGCTCTGGTCGTCCAGTTGAAGTTGAT…	TTGGGTTGGCAACTAAGTAATTGCGGATTTCACTCATAGATGGCTTCAGTTGAATTTTTAGGTTTGCTGGCGTAGTCCAAATGTAAAACACATTTTGTTATTTGATAGTTGGCAATTCAGCTGTCAATCAGTAAAAAAAGTTTTTTGATCGGTTGCGTAGTTTTCGTTTGGCGTTCGTTGAAAAATGGAAAATCAAAAGGAACATTATCGTCATATTTTGCTTTTTTATTTTCGCAAAGGGAAAAACGCATCGCAAGCTCACAAAAAGTTATGTGCTGTTTATGGCGACGAAGCCTTAAAAGAACGGCAGTGTCAAAATTGGTTTGACAAATTTCGTTCTGGTGATTTTTCACTCAAAGAAAAAAAACGCTCTCGTCGTCCAGTTGAAGTTGATGACGA…
Apidae	Apis	Apis mellifera	Tc1	1273	119	135	×	34/34	0.9412	AAGGG/AAGGA	DD41D	TA	AADG06014775.1:14653-15945	AAGGGTGTCCCAAAATTAACGCAAAATTTGAATTTGCCGCCATTTTTGCATTAAGTTGTTGGCAATCCTG AAAAAAGAACAGTTTGACAGCTAAGAGTTTAGGGTTAGTAAAAATGGAGCGTTATACGATACAACAACGT GTTTTCATTATTGAATAATATTTTAAAAATAATGAAAGTTTGGTGGCCGCAGTTTGAAAATTTTATACAA AATATGATAAAAATAGTGTTTTAACCTCGTCAACTGTGAGAAAATTAATTGAAAAATTCGTGGAGACTGA ATCAGTTGAAGACGCTAAATACACCGGTCGTCCAAAAACAAGCCATTCAAATGTTAATATTGAAGCAGTG CGTGAGAGGTGTTGGTAAAAACTCAGAAACATCAATTCGGCGTC…	AAGGGTGTCCCAAAATTAACGCAAGATATGAATTTGCCGCTATTTTTGCATTAAGTTGTTGGCAACCCTGAAAAAAGAACAGTTTGACAGCTGAGAGTTTAGTGTTAGTAAAAATGGAGCGTTATACGATACAACAACGTGTCTTCATTATTGAACAATATTTTAAAAATAATGAAAGTTTGGCGGCCGCAGTTCGAAAATTTTATACAAAATATGATAAAAATAGTGTTTTAACCTCGTCAACTGTGAAAAGATTAATTGAAAAATTCGTGGAGACTGGATCAGTTGGAGACGCTAAACACACCGGTCGTCCAAAAACAAGCCGTTCAAATGTCAATATTGAAGCAGTGCGTGAGAGTGTTGGTGAAAACCCAGGAACATCAATTCGGCGTCGTGGAC…
Apidae	Apis	Apis mellifera carnica	Tc1	1285	341	51	12	30/30	0.97	TTGGG/TTGGG	DD34D	TA	JACDQX010000002.1:15668310-15669594	TTGGGATGGCAACTAAGTAATTGCGGATTTCACTCATAGATGGCTTCAGTTGAATTTTTAGGTTTGCTGG CGTAGTCCAAATGTAAAACACATTTTGTTATTTGATAGTTGGCAATTCAGCTGTCAATCAGTAAAAAAAG TTTTTTGATCGGTTGCCGTAGTTTTCGTTTGGCGTTCGTTGAAAAATGGAAAATCAAAAGGAACATTATC GTCATATTTGCTTTTATTTTCGCAAAGGGAAAAACGCATCGCAAGCTCACAAAAAGTTATGTGCTGTTTA TGGCGACGAAGCCTTAAAAGAACGGCAGTGTCAAAATTGGTTTGACAAATTTCGTTCTGGTGATTTTTCA CTCAAAGACGAAAAACGCTCTGGTCGTCCAGTTGAAGTTGATGA…	TTGGGTTGGCAACTAAGTAATTGCGGATTTCACTCATAGATGGCTTCAGTTGAATTTTTAGGTTTGCTGGCGTAGTCCAAATGTAAAACACATTTTGTTATTTGATAGTTGGCAATTCAGCTGTCAATCAGTAAAAAAAGTTTTTTGATCGGTTGCGTAGTTTTCGTTTGGCGTTCGTTGAAAAATGGAAAATCAAAAGGAACATTATCGTCATATTTTGCTTTTTTATTTTCGCAAAGGGAAAAACGCATCGCAAGCTCACAAAAAGTTATGTGCTGTTTATGGCGACGAAGCCTTAAAAGAACGGCAGTGTCAAAATTGGTTTGACAAATTTCGTTCTGGTGATTTTTCACTCAAAGACGAAAAACGCTCTGGTCGTCCAGTTGAAGTTGATGACGA…
Apidae	Apis	Apis mellifera carnica	Tc1	1293	100<	31	×	34/34	0.92	AAGGG/AAGGG	DD41D	TA	JACDQX010000016.1:6782226-6783518	AAGGGTGTCCCAAAATTAACGCAAAATTTGAATTTGCCGCCATTTTTGCATTAAGTTGTTGGCAATCCTG AAAAAAGAACAGTTTGACAGCTAAGAGTTTAGGGTTAGTAAAAATGGAGCGTTATACGATACAACAACGT GTTTTCATTATTGAATAATATTTTAAAAATAATGAAAGTTTGGTGGCCGCAGTTTGAAAATTTTATACAA AATATGATAAAAATAGTGTTTTAACCTCGTCAACTGTGAGAAAATTAATTGAAAAATTCGTGGAGACTGA ATCAGTTGAAGACGCTAAATACACCGGTCGTCCAAAAACAAGCCATTCAAATGTTAATATTGAAGCAGTG CGTGAGAGGTGTTGGTAAAAACTCAGAAACATCAATTCGGCGTC…	×
Apidae	Apis	Apis mellifera caucasica	Tc1	1287	105	94	18	30/30	0.97	TTGGG/TTGGG	DD34D	TA	JACDQY010000132.1:330214-331500	TTGGGTTGGCAACTAAGTAATTGCGGATTTTTTTTAGAAAATCAAAGACAATTTTTTCATGGAACTAAAT AACTTTATTCTGTAATGTGTTGCCCATTTTGATCAATGACCTTTTGCCATCTTTCAGGCAGCATCATAAT CCCACGTTCATAAAACTTCTGGTTTTTATTAGCAAAAAACTGAATCAGGTACGATTTGATATCATCATCA TTATTGAAATTTTTACCATTCAAGGAGTTTTGTAAAGATCGAAACAAAAAGTAATCAGATGGTGCAAGGT CAGGACTATATGGTGAATGTAGCAAAACATCCTAATCAAGCTCCAATAATTTTTGTCGAGTGACCAAAGA TATATGTGGTCTTACATTGTCATGATGGAATACAACACCTTTTC…	TTGGGTTGGCAACTAAGTAATTGCGGATTTCACTCATAGATGGCTTCAGTTGAATTTTTAGGTTTGCTGGCGTAGTCCAAATGTAAAACACATTTTGTTATTTGATAGTTGGCAATTCAGCTGTCAATCAGTAAAAAAAGTTTTTTGATCGGTTGCGTAGTTTTCGTTTGGCGTTCGTTGAAAAATGGAAAATCAAAAGGAACATTATCGTCATATTTTGCTTTTTTATTTTCGCAAAGGGAAAAACGCATCGCAAGCTCACAAAAAGTTATGTGCTGTTTATGGCGACGAAGCCTTAAAAGAACGGCAGTGTCAAAATTGGTTTGACAAATTTCGTTCTGGTGATTTTTCACTCAAAGACGAAAAACGCTCTGGTCGTCCAGTTGAAGTTGATGACGA…
Apidae	Apis	Apis mellifera caucasica	Tc1	1273	119	31	×	34/34	0.94	AAGGG/AAGGA	DD41D	TA	JACDQX010000010.1:11887699-11888971	AAGGGTGTCCCAAAATTAACGCAAGATTTGAATTAAATATAAAAGAGAGTCTTTAGATATTTATTTTTTA AATGAATCATAAAGTACATAGGATAGGTTTATTTATGGAATAACACATCGGGCAAATGGCCTCCACGGCT TTGCTGGCACATACGCCCTCTTTCGTTGAAATTTTTTATGACCTTTCTGCATAATTGTGGCTAAATTTCG TTGATGCAGTGTTTAATTTGTAATGCACGTGTGGTTGTGGGATTATTCACATAGACCTTTGACTTCAAAT AACCCCATAAGAAGAAATTTAATGGTGTTAAATCACATGATCTAGGAGGCCAATTCCGATCACCGAAACG AGAAAGTACACGACCAGGAAATGTCTCATGCAGTAATTGAATTG…	×
Apidae	Apis	Apis mellifera intermissa-n	Tc1	1128	335	1	×	？	？	？	DD34D	TA	JSUV01212042.1:857-1984	TTATAGTATGTATATATTTTATTTAATTACATATTGACCATTGTGCTCTAATACATATTGCCATCTTTTA GGTAGTAGCATGATTCCATGTTCGTAGAATTTCTGATCTTTGTTTGCAAAATATTGATCCAAGTAATTTG TGACATCTTCATTTGAACTAAATGTTCTATCATCTAAAGAATTCTGTAAAGATCGAAATAGGTGGTAATC TGAAGGTGCCAGATCTGGTGAATATGGTGGATGTGGTAGCACTTCCCATCCAAGCTGTAATAACTTTTGC CGAGTCATTAAGCTCATATGAGCTTTGGTATTATCATGATGAAACACTACACCTTTCCTATTAATTAATT CAGGTCTCTTTTGTTTGATAGAATTGTTTAATTTATCCAATTGA…	×
Apidae	Apis	Apis mellifera mellifera	Tc1	1277	100<	43	19	30/30	1	TTGGG/TTGGG	DD34D	TA	QFDB01000009.1:10365397-10366673	TTGGGTTGGCAACTAAGTAATTGCGGATTTCACTCATAGATGGCTTCAGTTGAATTTTTAGGTTTGCTGG CGTAGTCCAAATGTAAAACACATTTTGTTATTTGATAGTTGGCAATTCAGCTGTCAATCGGTAAAAAAAG TTTTTTGATCGGTTGCGTAGTTTTCGTTTGGCGTTCGTTGAAAAATGGAAAATCAAAAGGAACATTATCG TCATATTTTGCTTTTTTATTTTCGCAAAGGGAAAAACGCATCGCAAGCTCACAAAAAGTTATGTGCTGTT TATGGCGACGAAGGCTTAAAAGAACGGCAGTGTCAAAATTGGTTTGACAAATTTCGTTCTGGTGATTTTT CACTCAAAAAACGCTCTGGTCGTCCAGTTGAAGTTGATGACTAA…	TTGGGTTGGCAACTAAGTAATTGCGGATTTCACTCATAGATGGCTTCAGTTGAATTTTTAGGTTTGCTGGCGTAGTCCAAATGTAAAACACATTTTGTTATTTGATAGTTGGCAATTCAGCTGTCAATCAGTAAAAAAAGTTTTTTGATCGGTTGCGTAGTTTTCGTTTGGCGTTCGTTGAAAAATGGAAAATCAAAAGGAACATTATCGTCATATTTTGCTTTTTTATTTTCGCAAAGGGAAAAACGCATCGCAAGCTCACAAAAAGTTATGTGCTGTTTATGGCGACGAAGCCTTAAAAGAACGGCAGTGTCAAAATTGGTTTGACAAATTTCGTTCTGGTGATTTTTCACTCAAAGACGAAAAACGCTCTGGTCGTCCAGTTGAAGTTGATGACGA…
Apidae	Apis	Apis mellifera mellifera	Tc1	1293	100<	27	×	34/34	0.92	AAGGG/AAGGG	DD41D	TA	QFDB01000042.1:134894-136186	AAGGGTGTCCCAAAATTAACGCAAAATTTGAATTTGCCGCCATTTTTGCATTAAGTTGTTGGCAATCCTG AAAAAAGAACAGTTTGACAGCTAAGAGTTTAGGGTTAGTAAAAATGGAGCGTTATACGATACAACAACGT GTTTTCATTATTGAATAATATTTTAAAAATAATGAAAGTTTGGTGGCCGCAGTTTGAAAATTTTATACAA AATATGATAAAAATAGTGTTTTAACCTCGTCAACTGTGAGAAAATTAATTGAAAAATTCGTGGAGACTGA ATCAGTTGAAGACGCTAAATACACCGGTCGTCCAAAAACAAGCCATTCAAATGTTAATATTGAAGCAGTG CGTGAGAGGTGTTGGTAAAAACTCAGAAACATCAATTCGGCGTC…	×
Apidae	Bombus	Bombus bifarius	Tigger	3275	364	1	1	20/20	0.9	CAGAA/CAGTA	DD33D	TA	JAAQOX010000100.1:3564583-3567857	CAGTATAAAGTTCCAAAATAGTAACTTTAGAAAAACTTGGAGTATTGATTTTGAACATTAAACCAATAAGAAAAGTTCATGTACACAAATGTCTGATGAGGTTTATTTGTCAAGTTATAATAAGAAAAGAATGTTATATGTAATTTTATTATGAACACTTTATTACGAAATCAATAACAAAATACAAAAAAGATATAGAAACAAATGTAAAGGTTTAAAAATAGAAGTGCAGAAAACATGGCAACAGGAATAAGTAATAACGTAAGTTATCACGAATACTAAAATTATTTGGTATTTGCTTAATAAATATCTACAAATATGATACACATACTTGAATACAAAAAACATACTTTTATGTTATGTATATATTATATCATAATACGTCACATAGCTTGGAAA…	×
Apidae	Bombus	Bombus bifarius	Tc1	1277	345	30	3	29/29	0.8966	TCAGG/CCAGG	DD34D	TA	JAAQOX010000119.1:42126-43406	TCAGGCATGTAAGTATGAAACCGGAATTTGCCTATAGATGGCCCTAGCTGATAATGTAGTTATCACTAAACTGCGTCATTGATGCCAAAAGTCTTTGTTGACATCTCACAAACATTTTCGACTCAGAACAATACAAGTTTCATAGTTTGTAATAGCGTTGAACATGTCAAATTTTGTGCCTGGAAACTACGATTTGCGGACAGCATTGATTTTCTGTTACCATTTGAAGAAAACTGCTGCAGAATCGCATCGAATGCTTGTCGAAGCTTACGGTGAGCATGCTCTTGGTAAATCACAGTGCTTTGAGTGGTTTAAAAAATTCAGAAGAGGCAATTTTGACGCGAGGAACGAAGAACGTGGAAGACCACCGAAAAAGTTTCAAGACAGCGCATTGCAAGC…	TCAGGCTGTAAGTATGAAACCGGAATTTGCCTATAGATGGCCCTAGCTGATAATGTAGTT ATCACTAAACTGCGTCATTGATGCCAAAAGTCTTTGTTGACATCTCACAAACATTTTCGA CTCAGAACAATACAAGTTTCATACAACAGCATAGTTTGTAATAGCGTTGAACATGTCAAA TTTTGTGCCTGGAAACTACGATTTGCGGACAGCATTGATTTTCTGTTACCATTTGAAGAA AACTGCTGCAGAATCGCATCGAATGCTTGTCGAAGCTTACGGTGAGCATGCTCTTGGTAA ATCACAGTGCTTTGAGTGGTTTAAAAAATTCAGAAGTGGCAATTTTGACGCGAGGAACGA AGAACGTGGAAGACCACCGAAAAAGTTTCAAGA…
Apidae	Bombus	Bombus bifarius	Tc1	1637	200	20	×	33/33	0.9394	CGGTG/CAGTG	DD34E	TA	JAAQOX010000115.1:1022923-1024559	CGGTGGCTCACGAAAGTATTCGAACGCTTACATTTACAAATTTTAATTAATAAAATGAGGTGTACTGGACTAATTTGTTAAAACAGTTTGGTATTTATAGTGACGAGAAAGTGTCAAGATTACGTCAATAAAATTTGAAAACAATTCAATAATATAGACAGGAGTTGTGACACATTTATTAGAAACATTCACGATAAGTGTTTCAGAAAAGTATTCGAACGTTGTAACACTGTTGATAGTTTTTCATCTTCCTCTGCACCGAATGTAAACATCATCGCTAAATGGAAATATTGGTACGTTCACTTGATGTTAGGATATCGTTTCAGTAAGAGTAACGTGAAAGTGTGCACAATAGTATTTAAAATGAATACCAAAAAGTTTGAAACAAAAGTGTGAAAG…	×
Apidae	Bombus	Bombus bifarius	Tc1	1339	303	17	1	28/28	1	CAGGG/CAGGC	DD40D	TA	JAAQOX010000145.1:400078-401420	CAGGGTGGTTGGTAACTGGTGGTACAAGATCGTTGTCTCGATGAATATTATCGCAGTTTAAGTTTGTTTTTACCGTAACGGAAAATTAGGAATACATAATGAAATAATATGAAGTAATCATAAAGTTTATTATTACAAAAATTGCTGAAAATGTTGCCCATTCTGCCGAACACATACTTCTGCTCTTCTAATTAAATTTCTATGAACACTTTCTAACGTATTGGATTGTTTTAAAGTATGAAAGGCTACAATAATCTTTTCTTTCAATTGCTCGCAACTTGCGATTTCTTCAGAATAGACAATTGATTTAATATGGCTCCATAAATAAAAGTCAAGTGGAGTTAAGTCAGGAGAGCGTGGTGGCCAAGCTATTGTTCCAGCACTACCAATCCAGCCTTG…	×
Apidae	Bombus	Bombus impatiens	Tigger	3197	364	1	1	19/19	0.8947	CAGAA/CAGTA	DD33D	TA	AEQM02008494.1:31670-34870	CAGAATAATGTTCCAAAATTAAATTTATGTAAGAAAATTACAGTTGCTAGATAACATAAGAATAAATAACGAAACATTTAAAGTTTTACTGTCGAATATATTATTGATCATGTCCCTTGATAATCGCGGACTCCTTTACGTGGAAAAACAACGCGCATTCTTCAGAGTAGCCATATCAACTGAACCAAGTAAAAGCATATATTATTGTCTGATGATCCGTCTGTATTATGGCAGGAAAACGGGTACGGATTTTATCGATATTCGTGGTTAATTGAGTTTCAATAAATTAATACAACCTATTTAATTGCATTTATTTTCTCGCTCAGTTTACTTGTGTTCCAAGCAACAAAAACGATTATTCCTATAACAAATATTCCTTATGTTCTTTATCACTACGTT…	×
Apidae	Bombus	Bombus impatiens	Tc1	1238	355	26	1	29/29	0.8966	TCAGG/CCAGG	DD34D	TA	AEQM02007354.1:64757-65994	CCAGGTATGTAAATATGAAACCGGAATTTTTGTATATTCGAAGTATTGCCCATCGCTAGCTATATATTTTTCCCACCTGTCTGGCAATTGGTGGATGCCACGCCAAAAAAACTGTCGCTCTTTTGAGGCAAACCAGTCATCGAGCCATTTTCGTACATTTTCGTAAGAAGTGAAGTGCTGGTCAGAATGTGCGTGTCCCATCGATGCAAATAAATAGTAATCGGACGGAGCCAAGTCTGCTGAGTAAGCCGCGTGCGAAAGTATTTCCCAACTGAACGCTTCGATCGTTTCCTTGACCGGTTTTGCTGTATGTGATGGTGCATTATCATGAAGCAAAATTACTTTGTGTTGCCTTTTTTGATATTCTGGTCGTTTTTCACGCAAAGCTTGATTCAAATC…	×
Apidae	Bombus	Bombus impatiens	Tc1	1565	193	42	×	92/92	0.8913	CACTC/CATTC	DD34E	TA	AEQM02009206.1:2072-3636	CACTCCTCGTCAAAGGGATAGTCCATGTGAACTATCTTTAATTTCTCAATGACGCGTGTAAAGTTTTTCGTCTGTAACGTATAGTATCAAAATATTATGAGCTCAGGACATGCGGCTTGCTGGAAATAAGTCACAATGTCGTAGATGTTTTTATACAAACAAGAAAAACTATTCCAATCTAAGGTCGAAATGATAGCACACTCTATTAATATGTTTAGAAATTGCTCAATAGTTCATGATCTATCTACGAGAAAAGGTTACAGTATATATATTGTATAAATTTGTAAGTATGGGACGCGGAAAAAGATTAAACGAGTCTGAAAAAAAGCAAATTGTAGAACTAAAATAGCAACAGTTATCAGTAGCAAAAATATCGAAAGTAATAATAAGAAGTCGTAA…	×
Apidae	Bombus	Bombus impatiens	Tc1	1344	303	19	×	28/28	0.93	CAGGG/CGGGG	DD40D	TA	AEQM02003541.1:152019-153362	CGGGGTGATTGGTAACTGGTGGTACAAGCGGAAAGGGGGTGATTCTACGCGAAAAAAAAAGTCAAAAATATAGAATAAAACTTTTTCGTTCGAGGCTTTGTTTTCGAGAAAATCGACTTTGAATTTTCGCTCGGTACGCGTGCACTTTATCGTGTCTCGTTATAATGGATCTCACTGTAGATCGTTGTCCCGATTGACGTTATGTTGATAAACACTTCCGAAGTGTTTTCCTACCTATTAACTTACTATCAGACTTTTATCGCTATCCACTATCAGTCTACCACCTATTAGTCTACCATCATGTCTACATACAGCAATCGGGAATATATGGACATGATACTTTCGTTAGGTGCGTGTGGTGGTAACGCATCAGCCGCAGCTGATCATTACAGACACCGG…	×
Apidae	Bombus	Bombus terrestris	Tigger	3280	364	1	1	20/20	0.9	CAGAA/CAGTA	DD33D	TA	AELG01003496.1:11029-14312	CAGTATAAAGTTCCAAAATAGTAACTTTAGAAAAACTTGGAATATTGATTTTGAACATTAAACTAATAAGAAAAGTTCATGTACACAAATGTCTGATGAGGTTTATTTGTCAAGTTATAATAAGAAAAGAATGTTATATGTAATTTTATTATGAACACTTTATTACGAAATCAATAACAAAATACAAAAAAGATATAGAAACAAATGTAAAGATCTAAAAATAAAAGTGCAGAAAACATGGCAACAGGAATAAGTAATAATGTAAGCTATCACGAATACTAAAATTATTTGGTATTTGCTTACTAAATATCTACAAATATGATACACATACTCGAATACAAGAAACATACTTTTGTGTTGTGTATATATTATAATATCATAATATGTCACATAGCTTGG…	×
Apidae	Bombus	Bombus terrestris	Tc1	1289	345	37	1	29/29	0.8621	TCAGG/CCACG	DD34D	TA	AELG01003701.1:120882-122980	TCAGGTCTGTAAGTATGAAACCGGAATTTGCCTATAGGTGGCCTTAACTGATAATGTAGTTATCATTAAACTGTCATTGAGACTTGCCGAAAGTCTTTGTTGACATCTCACAAACATTTTCGATTCAGAACAATACAAGTTTCATACAACAGCATAGTTTGTAATAGCGTTGAACATGTCGAATTTTGTGCCTGGAAACTACGATTTGCGAATAGCATTGATTTTCTGTTACCATTTGAAGAAAACTGCTACAGAATCGCATCAAATGCTTGTCGAAGCTTACGGTAAGCATGCTCTTGGTAAATCACAGTGCTTTGAGTGGTTTAAAAAATTCAAAAGTGGCAATTTTTACGTGAGGAACGAAGAACGTGGAAGGCCACCGAGAAAGTTTCAAGACAG…	×
Apidae	Bombus	Bombus terrestris	Tc1	1554	129	18	×	101/101	0.9208	CACTT/CACTC	DD34E	TA	AELG01000921.1:139523-141076	CACTCCTCGTCAAAGAAAGAGCCCATGTGAGCTATCTTTCATTTCTCAATCACGCGTGTAAAGTTTTTCATCTATAACATACAATATCAAAACATTATGAGTCCAGGATATGCGGTTCGTTGAAAATAATTAAAAATATTATGAGGTTTAGTGTGTAACAAAAAAATTTGTTTTGTTTTAAGAACGAAATGATAGCACATGTACAATAAGAAAATAATAATCAACATAAATTGTAACTAACAATAATTGCTTATCAAACGTATATACTTATTTAATAATGGGTACATCTCCCCTTATTTTCTATTACTTCTATTGTACGATTTGGTATCGATTTATATAGTTTCTGGATGTAATTTTGACTTAACGTATCCCATTCGCGTACAATTACATTTTTTAATT…	×
Apidae	Bombus	Bombus terrestris	Tc1	2258	355	33	1	194/194	0.9484	CAAGA/CAGGG	DD40D	TA	AELG01000709.1:5272-7529	CAAGATGGTCGGTAACTGGTGGTACAAACGAAAAGGGGGTGATTCTACTCGAAAAAAGAAGTCGAAAATAAAGAATAAAAATTTTTCGTTTGAGGCTTTGTTTTCGAGAAAATCGACTTTGAATTTTCGCTCGGTACGCGTGCACTTTATCACGTTTCGTTATAACGGATCTCACTGTAGATCGTTGTCTCGATGGATATTGTTGCAGTTTAAGTTTGTTTCTGCCGTAACGACAAAAATAATGAAATGATATGAAGTAATCATAAAGTTTATTATTACAAAAATTGCTGAAAATGTTGCCCATTCTGCCAAACACATACTTCTGCTCTTCTAATTAAATTTGTAGCAAATAAATAAAACTTATTTATTAACTGTAATATATATTTTAATAAAGATTAT…	×
Apidae	Bombus	Bombus vancouverensis nearcticus	Tigger	3275	364	1	1	20/20	0.9	CAGAA/CAGTA	DD33D	TA	JAAQRE010000234.1:6176177-6179451	CAGTATAAAGTTCCAAAATAGTAACTTTAGAAAAACTTGGAGTATTGATTTTGAACATTAAACCAATAAGAAAAGTTCATGTACACAAATGTCTGATGAGGTTTATTTGTCAAGTTATAATAAGAAAAGAATGTTATATGTAATTTTATTATGAACACTTTATTATGAAATCAATAACAAAATACAAAAAAGATATAGAAACAAATGTAAAGGTTTAAAAATAGAAGTGCAGAAAACATGGCAACAGGAATAAGTAATAACGTAAGTTATCACGAATACTAAAATTATTTGGTATTTGCTTAATAAATATCTACAAATATGTTACACATACTTGAATACAAAAAACATACTTTTATGTTATGTATATATTATATCATAATACGTCACATAGCTTGGAAA…	×
Apidae	Bombus	Bombus vancouverensis nearcticus	Tc1	1287	230	25	5	29/29	0.862	TCAGG/CCAGG	DD34D	TA	JAAQRE010000150.1:964083-965373	TCAGGCCTGTAAGTATGAAACCGGAATTTGTCTATAGATGGCCCTAGCTGATAATGTAGTTGTCACTAAACTGCGTCATTGATGCCAAAAGTCTTTGTTGACATCTCACAAACATTTTCGACTCAGAACAATACAAGTTTCATACAACAGCGTAGTTTGTAATAGCGTCGAACATGTCAAATTTTGTGCCTGGAAACTACGATTTGCGGACAGCATTGATTTTCTGTTACCATTTGAAGAAAACTGCTGCAGAATCGCATCGAATGCTCGTCGAAGCTTACGATGAGCATGCTCCTGGTAAATTACAGGGATTTGAGTGGTTTAAAAAATTCAGAAGTGGCGATTTTGACGCGAGGAACGAAGAACGTGGAAGACCACCGAAAAAGTTTCAAGACAGCG…	TCAGGCCTGTAAGTATGAAACCGGAATTTGCCTATAGATGGCCCTAGCTGATAATGTAGTTATCACTAAACTGCGTCATTGATGCCAAAAGTCTTTGTTGACATCTCACAAACATTTTCGACTCAGAACAATACAAGTTTCATACAACAGCaTAGTTTGTAATAGCGTTGAACATGTCAAATTTTGTGCCTGGAAACTACGATTTGCGGACAGCATTGATTTTCTGTTACCATTTGAAGAAAACTGCTGCAGAATCGCATCGAATGCTtGTCGAAGCTTACGGTGAGCATGCTCTTGGTAAATCACAGTGCTTTGAGTGGTTTAAAAAATTCAGAAGTGGCAATTTTGACGCGAGGAACGAAGAACGTGGAAGACCACCGAAAAAGTTTCAAGACAGCG…
Apidae	Bombus	Bombus vancouverensis nearcticus	Tc1	1637	214	20	×	33/33	0.9697	CAGTG/CAGTG	DD34E	TA	JAAQRE010000143.1:992562-994198	CAGTGGCTCACGAAAGTATTCGAACGCTTACATTTACAAATTTTAATTAATAAAATGAGGTGTACTGGACTAATTTGTTAAAACAGTTTGGTATTTATAGTGACGAGAAAGTGTCAAGATTACGTCAATAAAATTTGAAAACGATTCAATAATATAGACAGGAGTTGTGACACATTTATTAGAAACATTCACGATAAGTGTTTCAGAAAAGTATTCGAACGTTGTAACACTGTTGATAGTTTTTCATCTTCCTCTGCACCGAATGTAAACATCATCGCTAAATGGAAATATTGGTACGTTCACTTGATGTTAGGATATCGTTTCAGTAACAGTAACGTGAAAGTGTGCACAATAGTATTTAAAATGAATACCAAAAAGTCTGAAACAAAAGTGTGAAAG…	×
Apidae	Bombus	Bombus vancouverensis nearcticus	Tc1	1339	303	15	1	28/28	1	CAGGG/CAGGC	DD40D	TA	JAAQRE010000247.1:2485644-2486982	CAGGGTGGTTGGTAACTGGTGGTACAAGATCGTTGTCTCGATGAATATTATCGCAGTTTAAGTTTGTTTTTACCGTAACGGAAAATTAGGAATACATAATGAAATAATATGAAGTAATCATAAAGTTTATTATTACAAAAATTGCTGAAAATGTTGCCCATTCTGCCGAACACATACTTCTGCTCTTCTAATTAAATTTCTATGAACACTTTCTAACGTATTGGATTGTTTTAAAGTATGAAAGGCTACAATAATCTTTTCTTTCAATTGCTCGCAACTTGCGATTTCTTCAGAATAGACAATTGATTTAATATGGCTCCATAAATAAAAGTCAAGCGGAGTTAAGTCAGGAGAGCGTGGTGGCCAAGCTATTGTTCCAGCACTACCAATCCAGCCTTG…	×
Apidae	Bombus	Bombus vosnesenskii	Tigger	3274	364	1	1	20/20	0.9	CAGAA/CAGTA	DD33D	TA	JAAQVK010000022.1:72347-75620	CAGTATAAAGTTCCAAAATAGTAACGTTAGAAAAACTTGGAGTATTGATTTTGAACATTAAACCAATAAGAAAAGTTCATGTACACAAATGTCTGATGAGGTTTATTTGTCAAGTTATAATAAGAAAAGAATGTTATATGTAATTTTATTACGAACACTTTATTACGAAATCAATAACAAAATACAAAAAAGATATAGAAACAAATGTAAAGGTTTAAAAATAGAAGTGCAGAAAACATGGCAACAGGAATAAGTAATAACGTAAGTTATCACGAATACTAAAATTATTTGGTATTTGCTTAATAAATATCTACAAATATGATACACATACTTGAATACAAAAAACATACTTTTGTGTTATGTATATATTATATCATAATACGTCACATAGCTTGGAAA…	×
Apidae	Bombus	Bombus vosnesenskii	Tc1	1291	318	26	4	29/29	0.862	TCAGG/CCAGG	DD34D	TA	JAAQVK010000207.1:615587-616877	TCAGGCCTGTAAGTATGAAACCGGAATTTGTCTATAGATGGCCCTAGCTGATAATGTAGTTGTCACTAAACTGCGTCATTGATGCCAAAAGTCTTTGTTGACATCTCACAAACATTTTCGACTCAAAACAATACAAGTTTCATACAACAGCGTAGTTTGTAACAGCGTTGAACATGTCAAATTTTGTGCCTGGAAACTACGATTTGCGGACAGCATTGATTTTCTGGTACCATTTGAAGAAAACTGCTGCAGAATCGCATCGAATGCTCGTCGAAGCTTACGATGAGCATGCTCCTGGCAAATTACAGGGATTTGAGTGGTTTAAAAAATTCAGAAGTGGCGATTTTGACGCGAGGAACGAAGAACGTGGAAGACCACCGAAAAAGTTTCAAGACAGCG…	CCAGGTATGTAAATATGAAACCGGAATTTTTGTATAGAAAATACACGTTTATTGTATGAAAATGATTAAAAATATTTTATTCGAAGTATTGCCCATCGCTAGCTATACATTTTTCCCACCTGTCTGGCAATTGGTGGATGCCACGCCAAAAAAACTGTCGCTCTTTTGAGGCAAACCAGTCATCGAGCCATTTTCGTACATTTTCGTAAGAAGCGAAGTGCTGGTCAGAAAGTGCGTGTCCCATCGATGCAAATAAATAGTAATCGGACGGAGCCAAGTCTGGTGAGTAAGCCGCGTGCGAAAGTATTTCCCAACTGAACGCTTCGATCGTTTCCTTGACCGGTTTTGCTGTATGcGATGGTGCATTATCACGAAGCAAAATTACTTTGTGTTGCCTTT…
Apidae	Bombus	Bombus vosnesenskii	Tc1	1631	214	26	×	33/33	0.9697	CAGTG/CAGTG	DD34E	TA	JAAQVK010000017.1:9296-10926	CAGTGGCTCACGAAAGTATTCGAACGCTTACATTTACAAATTTTAATTAATAAAATGAGGTGTATTAGACTAATTTGTTAAAACAGTGTGGTATTTCTATAAATACGAGAAAGTGTCAAGATTACGTCAATAAAATTTGAAAACGATTCAATAATATTGACAGGAGTTGTGACACATCTATTAGAAACATTCATGATAAATGTTTCAGAAAAGTATTCGAACGTTGTAACACTGTTGATAGTTTTTCATCTTCCTCTGCACCGAATGTAAACATCATCGCTAAATGGAAATATTGGTACGTTCACTTGATGTTAGGATATCGTTTCAGTAACAGTAATGTAAAAGTGTGCACAATAGTATTTAAAATGAATACCAAAAAGTCTGAAATAAAAGTGCGAA…	CCAGGTATGTAAATATGAAACCGGAATTTTTGTATAGAAAATACACGTTTATTGTATGAAAATGATTAAAAATATTTTATTCGAAGTATTGCCCATCGCTAGCTATACATTTTTCCCACCTGTCTGGCAATTGGTGGATGCCACGCCAAAAAAACTGTCGCTCTTTTGAGGCAAACCAGTCATCGAGCCATTTTCGTACATTTTCGTAAGAAGCGAAGTGCTGGTCAGAAAGTGCGTGTCCCATCGATGCAAATAAATAGTAATCGGACGGAGCCAAGTCTGGTGAGTAAGCCGCGTGCGAAAGTATTTCCCAACTGAACGCTTCGATCGTTTCCTTGACCGGTTTTGCTGTATGcGATGGTGCATTATCACGAAGCAAAATTACTTTGTGTTGCCTTT…
Apidae	Bombus	Bombus vosnesenskii	Tc1	1650	353	16	1	203/203	0.9458	CAGTG/CAGGC	DD40D	TA	JAAQVK010000147.1:1546978-1548631	CAGTGTGGTTGGTAACTGGTGGTACAAGCGGAAAGGGGGTGATTCTACGCGAAAAAAGAAGTCGAAAATATAGAATAAAAATTTTTCGTTTGAGGCTTTGTTTTCGAGAAAATCGACTTTGAATTTTCGCTCGGTACGCGTGCACTTTATCACGTCTCGTTATAACGGATCTCACTGCAGATCGTTGTCTCGATTGACGTTATGTTGATAAACACTTCCAATGTGACCGAAGTGTTTTCCTACCTATTAACTTACTATCCGACTTTTATCGCTATCCACTATCAGTACCTATTAGTCTACCACCATGTCTACATACAGCAATCGGGAATATACGGACATGATACTTTCGTTAGGTGTGTGTGGTGGTAACGCATCAGCCGCAGCTGATCATTACAGACA…	×
Apidae	Ceratina	Ceratina australensis	Tc1	1286	359	1	1	29/29	0.9655	CCAGG/CCAGG	DD34D	TA	SHCU01000241.1:63612-64897	CCAGGTGTATGCATAAGTTGTTTCCGGTTTAACTAAGAGATGTCGCCATCGAAAATTGCGCAGTATATTAATTGGACACATACGTTATTTTGTTCGTCTGGCATTAATCTATAAACACACGCAAGTTGAGTCCGCCAAAAATTAGCGTCTTTGTTTTATCGTTCATTGATCATGTCGAATTTTGTGCCTGAAAAAGAACATTTGCGGCACGCATTGCTTTTCTTATTTAATCAAAAGAAAAAGGCTGTTGAAAGTCATCGTGTGCTGGTAGAAACATATGGTGAACACGCTCCATCGATTAGAACATGTGAGACATGGTTTCGACAATTTAAAAGCGGTGATTTCAATGTGAAAGACAGTGAGCGCTCTGGTAGACCACAAAAGTGCAAACACGAGCAA…	×
Apidae	Ceratina	Ceratina australensis	Tc1	1627	342	1	1	221/221	0.9774	CAGTG/CAGTG	DD34E	TA	SHCU01000004.1:6507-8133	CAGTGGCTCACGAAAGTGTTCGAACGCATACAAGAAATGAATAAAACAAGAGAGATATTTATGTTAGAGTTAAGTTTCGAAGATAGCACCTCAACTGCTGTCAGACGCAAGTATCAGGATAGTATGTACAAAATTTCAAGTCAATCGAACAGTGTGTATAGAAATTAAGAAACATTTATTATACAAACGTACTGCATGAGGGTCACGAAAGTGTTCGAACGGAAGAAATAATTTACATTTTTCACTACGTTAGTATTTGGTTGGACCTCCTTTCGCCTTAATTACTTCACTTAGACGTCGTCCCATACTGTGCACCAAGTTCTCCGTCACTATGGGTTCAATGGAGTTCCATATTTGTAATATTTTTTGTTTTAATTCATCCTTCGTTGAAATATTATG…	×
Apidae	Ceratina	Ceratina australensis	Tigger	907	141	10	×	24/24	0.9166	CAGTA/CAGTA	DD30D	TA	SHCU01000398.1:55580-56486	CAGTAAAACCTCTTTTTGTGCGGTCCTTTTTTATGCGATTTTATCTTTGTGCGATATTAAATTCGTGCTGGAAAGCGATCTGGCCTGAATGTGTAATTAATGTAACCGAAAACGCGTGCACGTTATTATCAGAAATAACTGCGCTCGCACATAAAATCAGCGGAGAAGGTTTTGATACTTTCGGCGAAAATGATCTGGACGAAATGATTGAGGACGAAACTCTCAATGATAGTGACATTATCAATACTTTGATAGATTATGAAGACGGACAAGAAGAACCGGAATCTATTACAGCAGATAAAATATATGCAGGGATCCAGATTTCTAAAAAATTGGAAACGCATTTTCTTAAAATAGACACTAATGCCGAAAGAAGATTGAAATTCCAAAAAGGGCTGA…	×
Apidae	Ceratina	Ceratina calcarata	Tigger	1605	176	3	×	28/28	0.86	CAGTA/CAGTA	DD29D	TA	LSNX01047183.1:6738-8342	CAGTAAAACCTGTTTTTGTGCGGTCCTTTTTTATGCGATTTTGTTTTTGTGCGATTTTATTTTTGTGCGATTTTTTTTGTGCGATTTATTTTTATGCGGTATATGAATCTTAGCGGCGTTAGCACCAGTTTAATGTTTCCTATCAATGTACATACATATACATTGCTGTGGACGAACATTCATTGCGAAATCAGAGAAAACTGCAAGTGGTTTTAAAACGGCAAAGGATCGAATCATACTTCTTCTTTGCAGTAATGCCTCTGGTGCAAAGATGTTAACACCACTTATTATAAATAAAGCTTTACATCCGTGGGCGTTAAAAGGCGTAAATTTATTTAAATATCCAGTACACTTCGTGGCCAATAAAAAAGCATGGGTCACATCAGCTCTATTTGCAAC…	×
Apidae	Ceratina	Ceratina calcarata	Tigger	1619	176	3	×	24/24	1	CAGTA/CAGTA	DD30D	TA	LSNX01048982.1:10219-11837	CAGTAAAACCTGTTTTTGTGCGGTCCTTTTTTATGCGATTTTGTTTTTGTGCGATTGGTTTTGTGCGATTTTATTTTTGTGCGATTTTTTTTGTGCGATTTATTTTTATGCGGTATATGAATCTTAGCGGCGTTAGCACCAGTTTAATGTTTCCTATCAATGTACATACATATACATTGCTGTGGACGAACATTCATTGCGAAATCAGAGAAAACTGCAAGTGGTTTTAAAACGGCAAAGGATCGAATCATACTTCTTCTTTGCAGTAATGCCTCTGGTGCAAAGATGTTAACACCACTTATTATAAATAAAGCTTTACACCCGTGGGCGTTAAAAGGCGTAAATTTATTTAAATATCCAGTACACTTCGTGGCCAATAAAAAAGCATGGGTCACATCA…	×
Apidae	Ceratina	Ceratina calcarata	Tc1	1287	345	5	1	29/29	1	TTAGG/TTAGG	DD34D	TA	LSNX01033444.1:1472-2762	TTAGGAGTATAAATAAGTTTCCGCCGTTTGACAAAAGATAGTGCCACCAGTATGTTATGGTGAAAATTGTCTGATGTAAGACGTCATATCGTAGGTTTGGACATCTTGTAACAACATAATCTTGAAATATTAGCGATTTTGTATCAGCATCATATATTTTTTTTCGTGCGAAAATGTCGAGTTTTGAGCCGAATAAACGTCATTTGCGGGAGCTTTTGATTTACTTCTTTAATTTGAAGAAATCTGCAGCTGAGGCGCATCGATTGCTTGTAGAAGCATATGGTGAGGCTGCCTTAAGTGAAAGAAGTTGCCGTGAGTGGTTTCAAAAGTTTAAAAACGGTGAATTTGATGTCGAAGACAAAGAACGTAGCGGAAGGCCGAAAGTGTACGAAGACGCGG…	×
Apidae	Ceratina	Ceratina calcarata	Tc1	1622	341	4	2	31/31	0.9677	CAGTG/CAGTG	DD34E	TA	LSNX01048772.1:10529-12150	CAGTGACTCACGAAAGTATTTGAATACCTACTGTGAAATACTTTATTAAGTATAATCAGTATGTTATACAACGCTTACCGAAATAATATTAACACTGTAAGTAGGTATGACTGTTTAGATTATGTACGTAAAATTTCAAACGAATCGAAATATATACACAACAGATATGAATTATTTCTTTCAAACATAAGCATTGTTGAATCCACAAAAGTATTTGAACACACAGAAATTAGTTCCAAGAACCAATAAAGACACAGTTGTCCGGGCACCGAATGTAAACTGATTGTTGTTAGTCGTCATCGTATGTACATTTGTCAGTCTCAGTTTAGCATTCATGGTGAAATATTACGATATTCATTATGTGTCCTAAAAAATCTGAAATTCCTGACAGTGTGAGAC…	×
Apidae	Ceratina	Ceratina calcarata	Tc1	1512	355	15	1	126/126	0.9761	CAGTC/CAATC	DD41D	TA	LSNX01032230.1:59796-61307	CAGTCAGCTTCAGTTTTTTAAATGGAATGTCTAACATTTTTGTTCAAATTCGGATAAATCATCAAATTTTCCGTAAAAAAGGACTACACAAAGTGGGACTTCAAATGAATAATTACTGAGATATTTATAAAAGAAGTTTTATTTCAAGTGGTGTTCGAATTGCTGTCCATTACAATCAATGCAATTACGTAATCGAATTGTCAGTGAGCGAAGAACTTTTTCCAGTGTTTCCGTGGTTATTGCAGCACATGCACTAATAATACGTTCTCGCATATCTTCCGCTGTGGTTGGTGGTTCGTGATAAACTCCATCTTTTAATGTTCCCCAAAGGAAATAATCCAGCGGCGTTAAATCTGGTGAACGAGCTGGCCAACCAATGTTACTGCCACGTCCAATCCA…	×
Colletidae	Colletes	Colletes gigas	Tigger	3414	532	3	1	24/24	1	CAGTA/CAGTA	DD29D	TA	WUUM01000073.1:129982-133395	CAGTAAAACCTGTTTTTGTGCGGTCCTTTTTTATGCGATTTTGTTTTTGTGCAATTAGTTTTGTGCGATTTTATTTTTGTGCGATTTTTTTCGTGCGATTTATTTTTATGCGGTATATGAATCTTAGCGGCGTTAGCACCAGTTTAATGTTTCCTATCAATGTACATATACATGTGTGGACGAACTCTGATTACGTGGTTTCCTTGACAACGATGTATCTGGACTTCGGGATGCTCTGTTCATTTATTTCAAACAATCTACTGACAAGGCAGAGTCAGTTACGTACATATTGTCGTTCGACGCGCGAACAGTATACGCTTCGTATTCAGGGTTTTATCCACGATTCACGTGATTAAGGATTCATTTTATAGCGAGATTAAAGGTAAATAAATTAGCTAC…	×
Colletidae	Colletes	Colletes gigas	Tigger	2482	567	3	1	24/24	0.92	CAGTA/GAGTT	DD30D	TA	WUUM01000082.1:208781-211262	CAGTAAAACCTGTTTTTGTGCGGTGGATAGGGACCGCATAAAAGAAATCGTACAAAAAAATATTCGGAAATTTTATAAATTCTTACATATAATAAACAACTTTGTACGATATACTACCTAAAATTTTTTTTATGCGGTGGATAGGGACTGCATAAAAAAAGTCTGACTTAGAAAATACATCAATGACTTATGAAATAGATGAGAGAATGCTTTTAATTAAATTAAATAATTAAATTAGACTTAAAGAAATTGTAAAAATATTTAATTCTTCATTGTACATATACATGGAGAAGTTTTCAAATTATACATTAAATAGCTTGGTTCTACTCGTCGTAATCCAAAACGCGCATCTTCTTGTGACGAATTGGTTGAAAATCGCTTTCGTCGCTTGAAGATAGG…	×
Colletidae	Colletes	Colletes gigas	Tigger	3033	534	4	1	29/29	0.93	CAGTA/CAGTA	DD32D	TA	WUUM01000045.1:1293899-1296931	CAGTATTGTCTCTCTATAGCCGCGCGTTTTCGGATTCTCTATAGACGCGAAGCTATCCCCACTACTTCGTTTGTAATCACCGCGCCGCCGAGTGGAGACCGGTGCCGAGAAGATATTAACTTTTTTCGATCGCGCCGCGACATCGGGTATCGGATATCAAAGAGAAAGCCGAAGAAAAGTTCATAACCTTTCTCAATACATAGTGACACACCTGACACTCTGACCGCGTGAACCGTCATACGAAACTGATCTAATTTACAACTTACTCGTAATCTATTACTTGTCTCTAAGCGTTTTAATAATGATTGTTATTATTACTCTATATGTAGTAATTTATAAGTACATATGTAATATACAGGATGTTCGGTTGGAAGTGTTATTCCTAATTGCATTTAGATT…	×
Colletidae	Colletes	Colletes gigas	Tc1	1260	135	6	×	27/27	1	TTAGG/TTAGG	DD34D	TA	WUUM01000001.1:2577356-2578613	TTAGGTGTAGAAATAAGTTCTTTCCGACGAATTTCAATCGTTTGCTATGATCATTTGTTGCGAGTTAATCTTCTACTCGTTTAGCAATCTGCAATACCAACAGAATAAGAAACAAAACAATGTCACAATGCAGCAAACTTCACATCATAACCTCCTTGTCGTCGTTAACAATGTCGCCGACGAAGGAGCATATTCGGCATTGCCTCTTATTTGCTTTTAATCTCCGAAAATCAGTGAGTGAAGCCACTCAAATGGTATGTGAAGCATATGGTGAAGGGGCTATTACTGATAGAACTTGTAGAAGTTGGTATCAACCGTTTAAATTAGGCGATTTTAACGTGAAAGATCAGCCTCGTTCCTCGCAACTGAAGAGTTGCAACAACTTTTGGACCAAGATTG…	×
Colletidae	Colletes	Colletes gigas	Tc1	1604	141	26	×	29/29	0.8965	CACTG/CACTG	DD34E	TA	WUUM01000015.1:109485-111088	CACTGCGGAGCATAACTATAGCACCACTAACATTTTTAACATTTCCGACCTGTAAGAAAATAATTTGAAACAACCAATTATATGGTATGAAAAAGCATTGTAAATAATGGATTTTAGGTGAAATTCATTGAAGTTATCTACTTATATGTCAAGATTTAATCGATAAACGTTTGACGATCGGTGCAAAACTATAGAACCAGTCCATTTTTAACGCACTTCAAGGGTTTCTGTTGGAATTTTTTTAGTAAACTCGGGAATTCTTAGTTAATTAATACAATGCCACGTGGCAACTACCTTAATGAACAAGAGCAAGGTGCAATTTCAGCGTACAGAGAACAAAAAATGGGGATACGTGAAATCGCACGTAAACTCGGGCGATCTCATAAAGTTGTACTGAAT…	CACTGCGGAGCATAACTATAGCACCACTAAATTTTTAACATTTCCGACCTGTAAGAAAATAATTTGAAACAACCAATTATATGGTATGAAAAAGCATTGTAAATAATGGATTTTAGGTGAAATTCATTGAAGTTGTCTACTTATATGTCAAGATTTAATCGATAAACGTTTGACGATCGGTGCAAAACAATAGAACCAGTTCATTTTTAACGCACTTCAAGGGTTTCTGTTGGAATTTTTTTAGTAAACCCGGGAATTCTTAGTTAATTaATACAATGCCACGTGGCAGCTACCTTAATGAACAAGAGCAAGGTGCAATTTCAGCGTACAGAGAGCAAAAAATGGGGATACGTGAAATCGCACGTAAACTCGGGCGATCTCATAAAGTTGTACTGAATT…
Colletidae	Colletes	Colletes gigas	Fot	2640	562	4	2	25/25	0.96	GGGGA/GGGGA	DD35D	TA	WUUM01000099.1:36966-39609	GGGGAGACCGGGGCTGGTTGACTAACTTTTAACATATTTAATTATTATAAATGAACCATTGTTATTTTATTCACTTATTGTATACCAATAGTTTACACATTTACTAAGGTATACAGTGTAATTTTTAAAGCCGCTTTGATTAAATCTAAGTTGTAGTTTTTATCACATTTATGCAGGTGTGAGCAATAAGTCAACAAACCCCGGCTTTGGGGTTAGTTGACTTATACGACGGGGTTAGTTGACTTGACATTTACTTTTAAGTTTTAAACAAAAACTAATAAACAAACAACATTTATTTTTTATACATATTAATTATAACGCTGAATTTTATTTATAAATCGTCATTTGAATTGCAATTTATACAAACGTAAAATATTTTATTTAAACCGATACACTTCT…	×
Colletidae	Colletes	Colletes gigas	Tigger	2190	571	3	1	23/23	0.8695	CAGTG/CAGTG	DD36D	TA	WUUM01000045.1:1352519-1354708	CAGTGGTGCCTCACACAACGAACTTAATTCGTTCCAGGAGCAAGTTCGTAATGCGAAAAGTTCGTTATGTGAAACGCGTTTTCCTATATAAATACATGTTAAAAAAAATAATTCGTTCTGTAGCATAAAATATGCTAAGATGACATAAAAAAAGATAAATTTTTTGTTATTATTTTTATTTAGATACATACATCTAAAAACATAATTTTTTTAATTTTAAAACAGACTAAGTAGAGTCTACCGAATCTTGCACATCTTCATCCATTTTCTGCTTTTTGGCCGATGATTTCATGAAAAACCTGTCCAAAGTCGTTTGTTTTTCTCTTTTCTTCAACATCTGCCGGAAATAACGGACAAGAGTATCGGAGTAAAGATCGTTGATCCTGTTTGCTTCAGCTG…	×
Colletidae	Colletes	Colletes gigas	Tc1	1301	347	3	2	28/28	0.9642	CAGGA/CAGGG	DD37D	TA	WUUM01000057.1:38436-39736	CAGGATGCGGCGCCAAAATCCGGACAAATGAGAGACTATTTGAAACATCATTTTTATTGCAAAAACGGAGAAATTTACAAATTTTTTTTGCTAAATTGTTTTGTAAGATCATAAAGAACACATTTACTCAATATATCCTCCCCCTGCTTGAATGACTGCCTCTATTCTCGGTCTAAAGCGTTTGCAGGCCCGTTTTAATGCGTCGCGGTCCATATTGGCGAATGTTGTTTCAATGGCGGTTTTCAATGATGCGACATTTGGATGTCTGAACTTGTTGGTGTCTCTTTCAACCACGCTCCATACATAGAAATCTAAAGGATTTAAATCTGGGCTGTTGGGAGGCCAGAATTCTTTGGACCAAAACATATCGACGTTGTCGGACAACCAATTTTGACACAA…	×
Colletidae	Colletes	Colletes gigas	Tc1	1882	347	7	1	29/29	1	CACTG/CACTG	DD38E	TA	WUUM01000024.1:9828-11709	CACTGCCGGCGGAAAGTTTCCGACCACCTCGATATTTGTGAATGATCCCGGAGTTAATGAAAATGGGGCTACAATATTGCATGCTCCTTAACGTCTAATCATGGGTAGATGTAGTATAGTACAAAAAGTTAAGTTTATAACATACAGTATTGTCTCTCTATAGCCGCGCGTTTTCGGATTCTCTATAGACGCGAAGCTATCCCCACTACTTCGTTTGTAATCACCGCGCCGCGACATCGGGTATCGGATATCAAACAGAAAGCCGAAGAAAAGTCGACGAGCCCCATCCCCCTTGAACGCTCGAGCGTCAAATCAAAGAAAGCCGAATAGACTACTCGTCTCTCAAGTTGCGTGCGCCCGGTCCCGACACGCGCGGCTATAGAGAGACAATACTGTATT…	×
Colletidae	Colletes	Colletes gigas	Tc1	1303	361	8	1	15/15	0.8666	ATGGG/AGGGG	DD41D	TA	WUUM01000064.1:121779-123081	ATGGGTTTTTCAGTAGCTATGTCCGAACTTTGACAGCATATTGCTGTGACGTTTCAAGTGGCAGCACTATCATTCTTTGACGCTTGTATTTTGTCATAGTTACCATTTTGCCATGGAGCGCTACACGATTGAGCAACGCGTCGAAATTGTTAAAATTTATTATAAAAATTCGTGTTCTGTTCGCCAAACTTTTCGCGAGCTACGAGATATTTACGGCCCAAATGATCGTCCAACCGAGCGATCAATTCAACGAATTATCGCGAAATTCCAGCAAAGCGGTTCGGTTGCTGATCGAGGAGTCCCTGTACGACGGAGAAACGCGCGGTCAAAGGAAAATATTGATGCTGTTGCTGAAAGTGTGGCTGAAGAACCAAATCTCTCGATTCCTCGTCGTGCACA…	×
Colletidae	Colletes	Colletes gigas	Tigger	2239	487	4	1	33/33	0.9091	CAGTG/CAGCG	DD33D	TA	WUUM01000009.1:9396028-9398270	CAGTGAAAACTCGATAAATGTCCTCAAGAGCTGTTCCATAAATGATACATTTTTATCCCCACCACTAGGGGGATCCCCCTTGAACCAGTGAGGCGAAGTGTAACCGGAGACGTAGCGGCTTTCTTTAAATATCTTTATTGCACAGAAGAAAGTTTTTTATTTGTTTACTTTTTGTTAATAAAAATTTCGCTAAACGCGATATAAATCGGTCAATATTTTGTAGCATAATATCGAATTAAATATTGTACTCGCGAGTCTTTCTCTCTTTATTTATCCTTCTTGCGCTGTCCTTTTCTATGCACGGAAATATCAAAGAACGACCGCATCGAGGTGCTGGCTACATTTATCGAACGGGAGGTAGCTATTTTCATACGGAACGGTTTCCACCCTTTCGTAAGT…	×
Halictidae	Dufourea	Dufourea novaeangliae	Tigger	2636	572	5	4	24/24	1	CAGTC/CAGTC	DD30D	TA	LGHO01003312.1:38525-41160	CAGTCAACCCTCCTATAACGCGGTACTCTCAGAACGCGGTTTCCATATAACGCGGAGCTGAAAATGCGACAGCCCTCCTATAACGCGGTACTCTCAGAACGCAGTTTCCATATAACGCGAAGCTGAAAATGCGACAGCCCTCCTATAACACGATACTCTTACAGCGCGGTTTCCGTCAACAGCATCCCATAAGTTCCTTCCGCGTAGCCTAAGAATGTTTAGCCTATGTTTAGTTCGTTAGGGCCTATTTGAATTATAAGGGAACAGATGGCGCCAGTTTCATGTAGGTCCAGGCAGTCGGATCGCGACATAGTAACTAGATATGTTTATATAAAGATTATCTCCGGCTTATCTGATAGCCGTCTACGACATCGGTTTTAGTCTTCTCAGAGCTCTTTC…	×
Halictidae	Dufourea	Dufourea novaeangliae	Tigger	1453	357	6	×	25/25	0.92	CAGGC/CAGTA	DD32D	TA	LGHO01002684.1:548-2000	CAGTAGGCCCTCGACTTTCGCACATAATTGGTTCATGAAAGTGTGTGCGAATGTTGAATGTTCGAAAGTAGAGGGACGTAAAAAAATATGCACCAAAAACTGTGTTTTAAAGTATTTATCTATCAATATGTATACATAATGAAGTTAAAGAGGCGTGTTAAGTGCTTTCGGGTGTTTCCTTTATAAAGTTGTCAAGAGTTAGTTGAATACCACCCATTTTTTTCTTTTCTTGATAAAGATTTCTATAACATGCTGTGTCTTTCTCAATTGCCCTACGTACTTGAGATATATGTTCTTCATTGGGATCACATTCTTCCATGATAGTAAAAAATTTGTCAAGATGCGTGAAGGCTTCATTCATATTTTTAATTGTCAAAGTCTTGACGTTTTTATCAGCTT…	×
Halictidae	Dufourea	Dufourea novaeangliae	Tc1	1286	345	3	1	28/28	0.9643	CCAGG/CCAGG	DD34D	TA	LGHO01000826.1:2718-4003	CCAGGTGTATGCATAAGCTTTTTCCGGTTTTTTGGTAAAAAAAAACATGTGATTTTGAAGGGAAATTAATATTTTTTTTATTCAAAATATTGGCCATCGGCTTCTACACATTTCGCCCATCTTTCTGGTAATTTATGAATACCATGCCAGAAAAAATGCTTGTCTTTTGCGGCAAACCATTCGTCGAGCCATTTTCCAACTTCCTCGAAATTGCTGAAGGGCTGCTCTGCGAGCGCGTGTCCCATTGATGCGAAAAGGTGGTAGTCAGATGGCGCTAGGTCTGGGGAGTACGGCGGATGCGGAAGAATGTCCCATCCAAGCGATTTTAAGGTGTCTTTCACTGATTTTGCTGAGTGAGACGGAGCATTGTCGTGTAACAAAATCACTTTACCATGTCTT…	×
Halictidae	Dufourea	Dufourea novaeangliae	Tc1	1570	330	4	1	35/35	0.9142	CAGTG/CAGTG	DD34E	TA	LGHO01002859.1:1566-3135	CAGTGGACGAAATTTGCATAGGGACACCATAATTTGCTGGAATAAATTCATTTATTCTATAAATTTCTACTCGTTATTGGTCGTAGACCTTACTAGCATGACATTGAATTTAGTACGAAGCGGTAACATAAACATACTCTCTAGTTTCCGTAATGGTAAACATAAACACAATAACATATGCCAAGGTAAGTACGAAATTTGTATAAGGACACTCGTGCTCTTGCATCAGTCAAGACAGAAACATCGTGTACAGCTTAAAGAAAGTAACTATTAGGAGAGTGTAATACTCTATTTTATAAATAATTCAATACAACTTATCTCCTATTAGAATGTCACGAGGAAAAATTCTAAGTACAGAAGAGCGAATAAAAATAGAAGCTTATCGAGATTCCGGGTTAT…	×
Halictidae	Dufourea	Dufourea novaeangliae	Tc1	1669	371	8	4	27/27	1	CAGTG/CAGTG	DD34E	TA	LGHO01000093.1:256619-258291	CAGTGACTCCCAAAAATATTCGGACACTACTGTATGACTAACTTTACGGCTTGATATTTCGATTATTTATAAAGCAATCACTATGGTTGTTGTTTCTGGCAATAGGTCATTTATTAATATTTATAAATGTGTCATTTATTTTAAAAAATTACATACATTGCATAATAAAAATTATTAAAACAGATAATGTCGTATTTTCAACTCACAAAAATATTCGGACACGTATTATATTTCTTCGCTAATCTCTTTCTGGTAACCCGATATTCCAAGAAGCAAGGATGTTTTGTTTACAAACAACGTCTAGAGGAGCATTAGATGTCCCTGCCGTTTCACTACTTTTAGTAACAAGCGTGAGTTCCTCCAGAATGGGTCGCAAAGGAAAGAATACAACGTTCGATA…	×
Halictidae	Dufourea	Dufourea novaeangliae	Tigger	2722	341	3	1	23/23	0.9565	CAGTG/CAGTG	DD36D	TA	LGHO01001118.1:11076-13801	CAGTGGTACCTCGACATACGAGTTTAATTCGTTCCGTAACCTTGTTCGTATGTCAAATTGCTCGTATCTCAAAGCAATTTTCCCCATTGAAATTAATTGAAATGCCATTAATCCGTTCCAGCTCCCAAAACACCACCTCAGTTGTTTTTGTTTTTGAATAAGAAAAATGTATTTACAAGAAGAAACATTTATTTATAAATAACAAATACATATTCTATAAAAACATAATAAAAGAAAAAGTGAAGTGCTTACGGAAGCGCTTAATTTTCATCACTGTTCTTCGCTTTTTTCGTCACGCTTGGCTCATTTTCACCTGCAGATCGTTTAAAAAATCTGTCCAAGGAGGTTTGTTTCTTCCTCCCTTTCAGGATATTGCGGAAATGAGTTAGGCAAGTTTCG…	×
Halictidae	Dufourea	Dufourea novaeangliae	Fot	2881	668	5	1	27/27	1	GGGGA/GGGGA	DD36D	TA	LGHO01002246.1:45903-48787	GGGGAAAGGTGTCTAAAACGATCCCTCTAAGGCGTAATTCATATAAAAAATACAAATGCTCATTATTTAAATAAAAGTAAAGTAGTTTTTGGAAGTTAGTCTATTTATCTTGTCATTGGCTTAAATAAAATGTAGCTACCTGATCAATTATATGTTTTATTTACATTTCTCTGAAGACATGCTTAAGGATCATTTTGTACATGTATGTGTATAAAATGATCCCCGGGGATCATTTTATACCTACTGATAGTAAATAAGACGAACATTAAAAAGCATCTCATTTATTACATTTTATTTAAATAAAAACAGGAATTAAACTCAATTATAAAATATACGAACATAAAATAATCTCATAAAAAAATAAAAACATAGATAATTTTTGGTACATAATAACTGAGT…	×
Halictidae	Dufourea	Dufourea novaeangliae	Tc1	1593	256	8	×	58/58	0.9483	CACTC/CACTC	DD36E	TA	LGHO01000570.1:433-2025	CACTCCCAGACAAAAAGATAGCACACGCGTGCTATCTTTAATTTCTCGTGTTAAGATTGTGCTAGCTTGAAAACTCTGAGTTATATGTAAAACGTACCTTCTACGAGTATATAAACATAACATAGATTGACTTTACTTCAGTGAATTCTCTTAGTTGGAAGAGAAACATAATATTCGACGCAGACAAAATGATAGCACACTTGAACTGTGTTTACATATTCTTCAGTGTTTCGTGAGCTTGCACAGAGTTATTACGTACAATGTGCGTCTAGAGCTTTGTTATAACGCTATCATAATGGGTCGTGGCAAAAAGCTGAGTGAAAGCGAAATTAGCACAATTTTAGCTTTGAGGAAACAAAAGTTGTCTATTACTCAAATTGCAAAAGAAGTTAATCGCGG…	×
Halictidae	Dufourea	Dufourea novaeangliae	Tc1	1312	302	3	2	30/30	0.9	CAGGG/CAGGG	DD37D	TA	LGHO01000949.1:668-1979	CAGGGTTAGGCGATTGAAGTGTTACCAACTTCACACCGGTATATCTGGCAACGCGATATTGCCAACTATGTCAAATTCATACCAATAACAGCTGTTTATGTTGTTTACAAGCTACCACAAGCATTTGCGTCTAAGTTTCATAGAACAAAAGTTATTCGAAATGGAATTCAAACGTAATAGTGTGATTGCGTTATATTTGAGTGGAAAATCACAACCAGCTATTGTTCGTGAGCTCAGGCATCTGAAAGTGAATAAAATGTTTGTGTATCGCACCATAAATCGTTATAATGATACAGGCAGCATTGCCAAACGCTATGGCGGTGGACGAAAGAAAAACAGCAACATCACCTGAAATGGTTCGGAAAGTGAAGGCTCGACTTGAACGAAATCCACGCCGTA…	×
Halictidae	Dufourea	Dufourea novaeangliae	Tc1	1557	347	4	1	29/29	0.9655	CACTA/CACTA	DD38E	TA	LGHO01002428.1:205288-206844	CACTACCGGTCAAAAGTTTGGGTCCACTTGCTTTATTTTTGAATTCTATACAATTAAGTCGGCCACTCAGTGGATTTTGTCAAGCACGTGCGTCTTGCTACTGGTCAGAGTGGAGAGGGCGCTAGTGTCTATTACGCGTAACACCATTGTGCTGCAAAAACTCACTCCAAGAGTTATATTTCCAATTGTTTGTTATATTTTTCTTTGTACAAAGTTGAGTAGAACATTTTTCGTATTCAAAATCATAAGTGTTCGACAAAAATTTTTATGTAAATTGACGTAATTCGAAAAATATCATCTCATTATTGAAATGTGAATCAAAATATATATTTCATGTTTCATTCGTAGAGAAATGGGTCGAAAAGCAGAGCTGAGTGTAGAGACACGAGCAGTTATTGT…	×
Halictidae	Dufourea	Dufourea novaeangliae	Tc1	1302	351	4	1	14/14	1	CAGGG/CAGGG	DD41D	TA	LGHO01003380.1:23544-24845	CAGGGTTTTCCAATTGGGACGGGTCGATGTTGACAGTCTGTAGCGGCCATGTTGTTTTGGCGGCGTCTGTCAAATCTGTTGTTTGTAATTCAGTCAGTAATGCCAAATCACCATGGCAAGTTACACGATTGAGCAGCACGTCCAAATGATAAAACTTTATTATCAAAATAAGTGTTCGTTAGTGCAAACATTGCGCGCGCTGCGCCCATTTTACGGCAGACGCGGTGGCCCTTCAAAGTCGACTCTCCAACGTTTGGTGGCCCAATTCGAGACGACCGGTTCGGTAAACAATCAGCCAACACCCGTACGTCAAAAGAACGCCAGATCGGCCGAGAACATCGCCTGTATCCGTGAAAGTGTGCAGGAGAACCCGAGGCAGTCAATTCCTCGTCGTGCACA…	×
Apidae	Eufriesea	Eufriesea mexicana	Tigger	2449	334	2	1	24/24	0.9166	CAGCC/CAGTC	DD29D	TA	LLKC01007739.1:45301-47753	CAGCCAAACCTGTTTTTGTGCGGTCCTTTATTATGCGATTTGTTTTATACGATTTTATTCTGGTGCGGTTTGTTTTAGGCGATTTTATTTTTGTGCGATCTGTTTTATGCGATGTTTTTTTATGTGGTATATGAATTCCAATGGCATTGACACCGTTGTAATGTTTCCTTTTTGTGTACAATGTACACTGCAAGGCGTTTGTCGCATTTAGGGGTTCATTTGTTGCGGACAGTCTTGCGACAATGCACATTCAGTCGCTGTCTTTCGACACGGTAACAGCATACGCTTCGTATCCCAAGTTTTAGCCACGACTCGCGTGATTAAGGATTCATTTTATAGTGAGATTAAGGGTAAATAAATTACTTTTTCTAATTTGTATGTAGTTTATATGATTTTTAT…	×
Apidae	Eufriesea	Eufriesea mexicana	Tc1	1299	231	23	1	12/12	0.9166	TTAGT/TTAGG	DD34D	TA	LLKC01001474.1:12737-14039	TTAGTTTGGTGCACATGAAATGTCGGATTTTTTTTACATGCGAACGTTTGTCTCTCCGCTTTCGTTATACTTTTGTTTTTGGCATAACCTCGTTTGTAGTCGTACTGTCCATTGCCAGACTCGCATTTCAACAAAGGAGGTTTTCGCGAAAGTGTTCCCTTTTGTTATTTATTTTGAATTTTGTACCAATATGAATTCAACCAATATTGGTGTAATTCCTTTGTATGAGTATAAACTTGGTAATAATGCTGCAAATTCTGCACGCAACATAAACCAAGCGTTTGGGGAGAATACAGTTAACGATCGAAAAGTGCAGCGTTGGTTTGAAAAATTTCGTTCTGGTGATTTTTCACTACAAAATGATCCGCGTGGAAGACCCAAAACTTCTGTGAAAAATGA…	TTAGGTTGGTGCGTATGAAATGTCGGATTTTTAAGTGAATGTATAAAACTGCATATCTTTTTTCAAAATCTGTTTATTCAATCAAAATATGCTCCATTCGCTTCAATACACCTTTCCCAACGAGACTTTAAAGCATAGATGCCTGTCTTAAAAAAATTCTGATCTTTAGAATCAATAAACTCTGATATTGAATTTTTCAAACTGTCTTCATTTTCATACTGTTTAGCCCGTAAAAACAGTTCTAAATGTTTAAAAAAATGAAAGTCCGTTGGCGAGAGATCAGGTGAATAGGCTGGGTGCTGCAAAACTTCATATTTTAATTCATTTAATTTCGCAATTGTTTTGTGCGATGTATGCGGCCGAGCATTGTCATGGAGAAGTAGTGGGCCATGCCGATTG…
Apidae	Eufriesea	Eufriesea mexicana	Tc1	952	214	61	×	50/50	0.96	CAGTG/CAGTG	DD34E	TA	LLKC01011732.1:6336-7287	CAGTGACTCACGAAAATATTCGGACACCAAGGTATGTCTGAATTAATCACAACGTATCGCAGATACGTTGTACCCGTGTTGCTTAAGAGTTCTCCGAATTGTTTCGGAATGAACTTGTATTCCTTTAACATCCATAATTCAGATGGAAAAGGAATGGTGTGGCAGAAAGCGAATGAAGAGTTTCACCATCGAAACACGAGAGGTACCGTAAAACACGGCGGAGGCAGCGTGATGGTTTGGGGCTGTATTTCGTGCAAAGAAGTTGGCAATTTAGTTTTTATTGACACCATCATGGACAAAAACTGTCACTTACACCTACTGAAAAATAATTTATTAAATAGTGCAGAAAAAATGGGAATTCGCAACAATTTTAAGTTTTACCAGGATAACGACCCCAAA…	CAGTGACTCACGAAAATATTCGGACACCAAGGTATGTCTGAATTAATCACATCGTATCGCAGATACGTTGTACCCGTGTTGCTTAAGAGTTCTCCGAATTGTTTCGGGATGAACTTGTATTCCATTAACATCCATAATTCAGATGGAAAAAGAATGGTGTGGCGGAAAGCGAATGAAGAGTTCCACCATCGAAACACGAGAGGTACCGTAAAACACGGCGGAGGCAGCGTGATGGTTTGGGGCTGTATTTCGACCAGAGGAATTGGCAATTTAGTTTTTATTGACACCATCATGGACAAAAACTGTCACTTACACCTACTGAAAAATAATTTATTAAATAGtGCAGAAAAAATGGGAATTCGCAACAATTTTAAGTTTTATCAGGATAACGACCCCAAA…
Apidae	Eufriesea	Eufriesea mexicana	Tc1	1668	137	18	×	111/111	0.9459	CACTT/CACTT	DD36E	TA	LLKC01009545.1:2942-4609	CACTTGCAGACAAAAGTTAAGAAACAACGTAATCATTTGGAAATTTCGGTATATCCTCTGTCTTCTAAGATAAATAGGTTGAAACTAAAAATAGCATAATAAAATAACAATACATACATGAATAAGCAATGAGTTTTTTTCGACCATACTTGTGCAAGGACCACAATTAAATTAAATCGAAGGAATAAGACAAAAGCTGTGTGACATAAGTTAAAAAACATACATTGTTTAATTTATATAACGACTTTAAATAAAAACAACGACATGCAGATATCTGTAATTTTTATAACAGTCTCATAAGATGTTGGATAACTCTTGAATTTGAGGATTAGATGGCATCTGCATGGTATTGATTCAATTAATCGAACACAAAGCTCAGCTGATATTTCTGACCATATT…	×
Apidae	Eufriesea	Eufriesea mexicana	Tigger	2657	571	3	2	24/24	1	CAGTC/CAGTC	DD30D	TA	NW_016909472.1:88585-91241	CAGTCAACCCTCCTATAACGCGGTACTCTCAGAACGCGGTTTCCATATAACGCGGAGCTGAAATTGCGACAGCCCTCCTATAACGCGGTACTCTTACAGCGCGGTTTCCGTTCAACAACGTCCCATCAGTTCTTTCCGTGCACCCAATGAATGGTTTTAACTGGATATGTTTATATCAGCGTTGTCCACGGGTGGGGCTCCTCATGCGCTATCTTCCACTTCTATTAACTAAATAGTTTCGCATCGACAGCGTGCCATGCGTTTGTGTGTCTAACGAAACTGTAACATGAAAGATATATATGTGATCTTTTGACTACATTGTCGCGTGAACTATAGAAAAACTACGTTCTGCTTATGTCTTAGCCGTTTACGGCATCGGTTTCAGTCGTCTCAGAGCTG…	×
Apidae	Euglossa	Euglossa dilemma	Tigger	1479	352	8	×	24/24	0.9166	CAGTC/CAGTC	DD30D	TA	NIJG01000773.1:8814-10292	CAGTCAACCCTCCTATAAAGCGGTGAGTGCGTACCGCGTTATATGGAAACGCTATAAGAAACTTGGATTTAATCGTACAAACCAGACTAATTCGTAGCGCGCTGTATGGAAACCATCTACAGCGTTGTATGGAAACCGCGCTATAAGAAACTCAGAATTAACACGAATCGCACTATTCGTACCGCGTTATATGCAGGCCAATAAATATAAATGACAAGATTAAATTATAAATTATTTTTATTGAATTGAAGAGTTCATATAAGGAAATGATAAAAAAATGAAACAGAAACAAGAAAGACTTTTGTAAAATCTTTTAATACTCATCCTCGCTGTCAAATATGAGTCGCCTAACTCGTCTTCTTTTAATGGGCAAAACGTCATCCTCACTTGGTTTATCTT…	×
Apidae	Euglossa	Euglossa dilemma	Tc1	1287	328	119	28	31/31	0.9677	TTGGG/TTGGG	DD34D	TA	NIJG01000059.1:4902049-4903339	TTGGGTTGTCCGGAAAGTTTGTGCCGATTTTTAGGAAAATTAAAACGCAGCTCATTTAAATATTGGTATACATTTATTAAGTTATATAGGTACCATTCTGTTCCACAACCTTTCTTCATCTTTCATGCAGCTTGAGAATTCCGTCCTTCCAGAACCTCTCAGGTTTTTCGGCAAAAAAATTGTCCAAATGGGTTTTTATCTCGACCAAAGAGTTGAAATTTTTTCCATTAAGGGAATTTTGTAATGATCGGAAAAGGTGGAAATCCGAAGGCGCAAGGTCTGACGAATACGGTGGATGGGGTAAAACATCCCAACCAAACTCCAACAATTTTTGCCGAGTTCTCAAAGACACACGAGGTCGCGCATTGTCCTGATGAAACACGACGCCCTTCCGATTCG…	TTGGGTTGTCCGGAAAGTTCGTGCCGATTTTTAGGAAAATTAAAACGCAGCTCATTTAAATATTGGTATACATTTATTAAGTTATATAGGTACCATTCTGTTCCACAACCTTTCTCCATCTTTCATGCAGCTTGAGAATTCCGTCCTTCCAGAACCTCTCAGGTTTTTCGGCAAAAAAATTGTCCAAATGGGTTTTTATCTCGACCAAAGAGTTGAAATTTTTTCCATTAAGGGAATTTTGTAATGATCGGAAAAGGTGGAAATCCGAAGGCGCAAGGTCTGGCGAATACGGTGGATGGGGTAAAACATCCCAACCAAACTCCAACAATTTTTGCCGAGTTCTCAAAGACACACGAGGTCGCGCATTGTCCTGATGAAACACGACGCCCTTCCGATTCG…
Apidae	Euglossa	Euglossa dilemma	Tc1	1781	143	31	×	26/26	0.923	CAGAG/CAGTG	DD34E	TA	NIJG01004513.1:7244-9028	CAGAGGATGTAGAAAGTATTCGTACATCGATGAATTTCAAACAAAACTTCGTGAAATGATAGCTTACT CATTATTTCTTCTGTAAACAATGTGTTGTACATACTCTTGGAAATCTCGAGAGTACATGCAGTGCAACAA AATAATCTGTTGTTTGTATAATTAGTAAAATTAACAAGAATAATCAAAATATCGACAGAATTATACGAGC AATAAGTATTCGAACAGCTCCTGATTCGAACTGTTTACAAGACAGATTACAACGTAAACATTTACATAAC TGCTTCATAATTATGATTGAGATAGTCAGTGTGTTTGGATACAATATAGGCATCAGTTCTGTCCAAAATT TTGTGTTATTCCAAATTGTCGGTGAGAAATGGGTCGAAAACATGCT…	×
Apidae	Euglossa	Euglossa dilemma	Tc1	1334	353	3	3	37/37	0.9729	CAGGG/CAGGG	DD41D	TA	NIJG01004144.1:14586-15923	CAGGGTGCTTCAAAAAAATGTATACACACTTTGAACTTCCATAGAAAATTTATTTACCGTTCTACAAA GTTAAATTTCAGGAAAATAGAAAGCTGAAAGTCCAATGTAAATGAAACATAAATAACAAATGTCAATACT GTTCAAATTGGTGACCTGCAGCATCAATACAATTCTGAGTACGAGTCACCACTGATTCTGTACATCGTAT CAAAACGTCCAATGAGATTTCTCTACACACTGCTTGAATCTCATTCCAAAGAATGTCTAGGTTACGTGGT TTACGTTTGTACACCTCATCTTTTACTGTGCCCCACAAGAAGAAATCCAGTGGTGTAAGGTCTGGAGAAC GTGCTGGAAACTCGATTGGCCCCCTGCGTCCTATCCACTGGCCCGA…	×
Apidae	Frieseomelitta	Frieseomelitta varia	Tigger	2546	493	1	1	21/21	0.9048	TCCCC/TCTCC	DD33D	TA	WNWW01000182.1:2183011-2185560	TCCCCCATCAATTCTTGGAATGTCTTCACTCTACGTTACTTTACTACGCACACAAAACAAGTAGTGTATGTCATGATACCAATGTGTGTGCCTGGCATCGGTGAAACTGTTTACACACATCCCCACTCTTTCTCTCGGTGCCTGGAATACACCGCCCCTCTTAATTGACCAGTTTCGGTCCCGACTGTTGGACAGTTGCGAGGTCACTACTGTATCGTGTATTACATTAATCTGAATTAATATACCGAATTAATCGATTGACACAGTATTTCTTTAATAACGTTTTGTTTCAAATGTGAGAAGAACGCGCCATTCAGAAAACCGAGATACGCATATCGGTAAATACGATAGTCTCTAGTGGACATTTAAGAAGGGCGGTGTATTCTGCGAATTGGCTTC…	×
Apidae	Frieseomelitta	Frieseomelitta varia	Tc1	1273	100<	6	×	19/19	0.8947	TTGGA/TTGGA	DD34D	TA	WNWW01000244.1:545598-546874	TTGGATTGTCCGAAAAGTTCGTGCCGTTTTTTAAGGAAATTTTAAACGCAGCGCATTTAAATTTCGAT ATATATTTATTGAATTATATAATTGGCATTTTGTTCTACAACCTTTCTCCATATATCATGCAACTTGAAT ATTCCATCCTTTCAAAACCTCTCGGGTTTTTCGGCGAAAAACTTTTCAACATGATTTTTTATTCCAACCA GAGTTAAAATTTTTGTTATTAAGGGAATTTTGTAATGACCTAAATAGGTGAAAATCTGAGGGTGCAAGGT CTGGTGAAAACGATGGGTGGGAAAGCAGATTCCAACCAAGCTCCAGCAACTTTTGTAGAGTAGTCAAAGA CACATGTGGCCGCGCATTGTCCTAATGAAACACGACGCCCTTCCAA…	×
Apidae	Frieseomelitta	Frieseomelitta varia	Tc1	1805	204	27	×	25/25	1	CAGTG/CAGTG	DD34E	TA	WNWW01000229.1:179668-181472	CAGTGAGCAACAAAAGTATTCGAACTGAAAATAATTGATTATACAAAAATTGTATAATAAATTGCAATTTATTAAAACAAATTGTTCTTATACTATTGTATATACATTTGATAAATGTATGGAAAGTTAGAGAAAAATTAAACTATAAGTAAACAAATTACATAACATCTTTCACGGATAAGTACATATAAGGCATATTCGAACAAAAGTATTCGAACGCAATTTTAATAGTCATAGAATGCAATATACGTGATTATATTACATTTTAATATCTAGTTGGGCCACACTTAGCTTTAATAACCTCTCAAAGACAATTTTTTTTCTATATTATTGATTAAGTTTTGGTAACACTTGAATCCATGGAGTGCCACACTGCTAAGATATTTTGTTTTAAAGAAT…	×
Apidae	Frieseomelitta	Frieseomelitta varia	Tc1	1024	118	401	×	15/15	1	CAGGG/CAGGG	DD41D	TA	WNWW01000882.1:42794-43821	CAGGGTGTTTCGTAAACTCGCGGGACCCACTTCGGGAGCTGATTGTACGCCTAAAAATAATGAAGAAAAAAGTCAAATATAAATATAATAAATTTAAATATCTGTCTTCGTTTATGAGATATAATGAATTTTATAAACAGAGCAAACTCTCTGTCCGGCCTCTCTTTCCATAGTTCGTAAGCAAGAATTCGCACTATTCACAAATAATACTTACTTGATATCTTTCGTTTTTTTGTACTTGGTTCCTGCAAATGTGTGAACGTGAAGATAGTTTTGTATCTACCATACTTTTCACTGATGAAGCTAGTTTTACCAGGGATGGTATATTCAATTTTCATAATAATCGTAATTGGGATGAAGGAAACCCACACGTTATTGTGCATTCAAGACATCAACACC…	×
Apidae	Habropoda	Habropoda laboriosa	Tigger	1004	100<	24	×	24/24	0.9166	CAGTC/CAGTC	DD30D	TA	LHQN01017697.1:17081-18084	CAGTCAACCCTCCTACAACGCGGTACTCTTATAACGCGGTTTCCGTTCAACAACATTCCATCAACTTAATTGGTTTAAGAAGATTCTCTATAGCATGAATTTATCTATGTGTTAAATTTTTACAGTTGAAATTAGCGGGGAATTCCCTTCTTTTTGGTGAAGGTACGTCACCATTTTCCAATTTCAGTTATCAGGGAATTCCCCTATAAGCCGAAGAAACGATGCGAGATCGTTCACAGTGTTCTGTTTTAATGGGTGCCAAATCTCAATTTATATGATGTGAAAAAAGGGCTAAATTTGGCTAAAGAATTAGAACTTCATTTCGCTCAAACTGATCATTCAATGGTGCGCAGCGCAAAGTTTAAAAGAGAGTTAAGAAACTGCTTAGCTCCGTATAGA…	×
Apidae	Habropoda	Habropoda laboriosa	Tigger	2006	479	2	1	24/24	0.9583	CAGTA/CAGTA	DD33E	TA	LHQN01004087.1:3305-5314	CAGTAGTGCACACATAAGCATCCGCAGTCGGGACCGAATGCGGATGCTTCAGTGGGGAGTGACTTCTGCGAATTTAACTAAACAAAAGAGAGGAGATGTGCCTGAGTGGGATACCGATACCCGGCACGTGTGAGTCGACAGTATCAAGTGTCAGTTGTTCACATTCAGAAGTCGATGCCGAATACAATATTATTCACGATGGCTGCTAATAGTACTGTTTCCAGTAAACAAATTAGTATAGAAAAACGATTAGAAATATTAAACAAATTAGAAGCTGGTGTAAGTGTTAATGATCTGGCACGGGAATACAATGTGACTGACAGAAGCATACGTAGAATTCGACAAAATGTTTTGTCGATACGACAATTTGCAGAGAATAGTCAACATTTAACAAGGAAA…	×
Apidae	Habropoda	Habropoda laboriosa	Tc1	1286	339	3	1	36/36	0.8888	TTAGG/TTAGG	DD34D	TA	LHQN01005809.1:21039-25485	TTAGGTTGGTAGGAAAATAATGTCGGTTTTCAAGCTATATCTTTAAATCCACATATTACAAATTGGAATAAGTTTTTTTAATCAAAATAAGATCCATTACAATTTACACATTTTTGCCAACAAACTGTCAGTTTGTTGATTCCAGTAGCGTAAAATTCTGTTGTTCTGGAATTGATAAATTCTTTAAACGCATTTTCAGCAGCTGCTTGGTTGGTAAATATCTTCCCTTGCAAGTAGTGGTCGAGATGTTTGAAGAAGTGGTAATCAGTTGGCGACAGATCCGGGGAATATGCTGGATGGGGCAGAGTTTCATATCCCAATTCATTCAACTTTTGTAGCGTTAACTGTGCGACGTGTGGTCGAGCGTTGTCGTGTAGAAGAATTGGGCCCTTCCGATTA…	×
Apidae	Habropoda	Habropoda laboriosa	Tc1	1630	340	8	5	26/26	0.9615	CAGTA/CAGTA	DD34E-1	TA	LHQN01021816.1:32779-34408	CAGTAGCGGACAAAAGTTTAAGACGATGATTTGTAAACCGGATTACAAACATCTTATACGCATATTGTTCTTCTATTCGGTTTGTCTCTTTGGAATAACGTAGCTGTATGTTTGACCTTCGTAACCTCAGACAGTCAGTTGTTAAATACAAACAATGTAGGAGTTACAACAGTTAGTTACCGCTTAGCACTTGGAAACAGTGGACATTAGTTTAAGACGATCTGTGTAAAACGTGAGTACGAGTACAGTTTTTGAACATTTTGATTCTGGAATGTCAAAATCATTGTTTAGTGTACCTTTTATTGCTTAAAATTCATTTAGGTAGGAACAGACTATGGGTAAATCAAAGAATTTACTTGAAAACGAAAGGGAACAAATCGTAAGGCTGCGAAAGCAAAG…	×
Apidae	Habropoda	Habropoda laboriosa	Tigger	2199	212	2	×	23/23	1	CAGTC/CAGTC	DD36D	TA	LHQN01011933.1:11795-13997	CAGTCAAACCTCGGTTCACGAACGCCTCGGATCAAGAACAATTCGGTTTACGAATAAATTTTCCGAAT ACAAAGCGTCTCGCATGACGTACTGTGTTTTGCGTTTTTTTATAAATTATTAAATAGGACACCATAGGGC TAAAGAAAGATAATGATAGCAGCAAAGTAAAAAGAAAAAATACCAATATCGTGATAGATGTTAAGAAAGA AATCATAGCCAAATATGAAAATGGTGTTCGTGTCTCGGATCTTGCTACTCAGTTTCGGATGGCAAAATCA GCGATCTGTACAATTTTTAAAAATAGAGAGACAGTCAAGAAAACTGATGTTGCAAGAGGAGTGACGGTTA TTACTAAACAAAGATCACAGACGATTGAAGAAGTGGAGAAATTGTT…	×
Apidae	Habropoda	Habropoda laboriosa	Tc1	1306	351	3	1	29/29	0.9655	CAGGG/CAGGG	DD37D	TA	LHQN01001905.1:4861-6166	CAGGGTGCGCCGTTAGAATCCGGACAAAAGAAGTTTTATGCGAAAAGTTGTTTATTTAAGCCAATATACAAAAATATAAAAAAATTCTGTTATATCTCATTTAAAGGCTTCTTGCTGAGAACTTTTATTCTATATAGCCACCCTGCGCCTCTATAACCTGCTCGATTCTTGCCCTAAAGCGCGAGCACGCTGACTTCAATTGGTCGCGTTTCATAGCCGTGAACTCTGCCTCGATAGCAGCTCGCAGGGAGTTGACGTTGAGGTGCCTGCACTTATTAGTGTGTCTCTCGATTACGCCCCACACGTAGTAGTCCAGTGGGTTTAGGTCGGGACTGTTAGGAGGACAGAAATCCTTCGACCAAAACATGTCGACATTATCAGAGAGCCAATTTTGAACAA…	×
Apidae	Habropoda	Habropoda laboriosa	Tc1	1638	347	50	2	28/28	1	CACTA/CACTA	DD38E	TA	LHQN01012059.1:27927-29564	CACTACCGGCCAAAAGTTTGGAATCACTTGCCGATTTCTATCAAAATCGAATATACCGGTAAATTTTGGAATGATCCATCGTTAATATATCAGATGTTAACAAGTTGATTTATACTTTAAGAGATTTCAGCATTTTCTTATGTCCATAATACTATTATATAATTCATACACTCAGTTTAAGGCAACGCTCGGAATGAACTTTTCTACTGCCGGGAAAGATGCTCTGTTTTCGCCTTATATAGGAATTCGCGATTCTTTTGTTTACAAATAAGCGTCGAATATTACAATATTAGATTCCAATTGGCTGGTCCGGGGGCCGAGAAAATGTATAAATCGGACATTTGTTATACATTGCCACCATTCTCGTGAACGAAGGCGTTGAAACGTGATCAGCAGGTA…	CACTACCGGCCAAAAGTTTGGAATCACTACGTAAATTAAGAGAAACAGGATATTTCTAAGAAAAATTGAACGCCTACAAAGTAATTGAGGAAGTTTTATTTGTCAAAATACTTATAAGTAGAATATTTTACATTTTATATTATTTTTTGTACGAAGAAATAGATATTTTTCTTTAAATTGCCTTTTCATCAAAAAAACCGCCCTTACTTCTAATGACAGCCTGACATATTCTGGGCATCCTGGCAATTAGTTTTTCGAGTATTTCTAACTTTAAATTTTTCCATGCTTCTTGTAGTAGTTGCCAAAGGTGTCCTTTCGATGTTGGACAGTGCAACCGGATATTCCGATCGAGCTCTTCCCACAAAAATTCTATCGGGTTCAAATCCGGTGATTGTGCTG…
Apidae	Habropoda	Habropoda laboriosa	Tc1	1304	214	3	×	32/32	0.9687	CAGGG/CAGGG	DD41D	TA	LHQN01018764.1:5287-6594	CAGGGTGCGCCATCTTTTATGTCGGTATGTGATTATTGAATAACTTTAAAAAAAAACAACCGATTTCC ATATATGAGGTATTTTTATTTAATTTGGTCCTTTACAATTTATTTGGACTAGTTTTTGAATACAACATCA ATCAAGTGGCCGCCTTTATTGTCCAAAGCAAAATGTGCCCTTTTTGCTGCGTTTTCCATCACTTTTTCGA GCATCTCGGGCGGAATAGCGATGATTTCGGCACGAATGTTTGCCTTGAGCTCGTCAATGGTCTGAGGCTT GCTGGCGTACACTTTGCTTTTCAAATAACCCCACAAAAAGAAGTCCGGAGGGGTCAAATCTGGAGATCTG GGTGGCCAGTCAATGTCGCCATTTTTTGACACCACACGTCCAGGGA…	×
Apidae	Habropoda	Habropoda laboriosa	Tc1	1334	339	9	2	31/31	1	CAGTA/CAGTA	DD34E-2	TA	LHQN01022381.1:4785-6118	CAGTATTGTGCGAATTAATGTGAACACAGAGAGTTTTCTGGTAAATATCATGTATTTGAAATAAAACTAGTGTTAGGTGAATATACATAGCTTTTTTACTACTAGTTAATATAAAATATGTCCCGCCTTCGCTTTAATGACTGCCTGCACTCTTCTTGGCATGGAATCGATTAGATTCTTACAATTATTCTTAACTGTCTCGTCTCGAAACCACACCTGAATTACTGCTTCTACCATTTTAATTGTCGTGGTACAGTCCATTTTTTGTAATCGGACCTTGCAAATGGCCCACAGATTCTCAATTGGATTGAGATCTGGTGAATTTCCAGGCCAGTCCAGAATGGTAATCTTCTTGTCCTTGAAATATTTCACCATAGACTTGGAAACATGGCATGGCGC…	×
Apidae	Habropoda	Habropoda laboriosa	Tc1	1639	148	3	×	48/48	1	CAGTT/CAGTT	DD36E	TA	LHQN01004716.1:13227-14865	CAGTTACTCACTTTAATATTCGGACACTATAATACTTTTAAGTATAATTGCTTTATATCTTCCTGAATTATTAAAATATTTATTCACTAGTTTTTTACCATGTTAACTTATTTATTATAGACAACAGAAACATAAAAAATTATTTTGTAATTGCAACATGTCCTTACGTAATGAAGGATAAACAAAACGATGTCTATTTTACGCGTTACAAAAATATTCGGACACTACAAAAAGTTACATTATGTACATACATTTTACATAAGATTAAACAAAAATTCAGTATTTTGTTGGATATCCCTTATGATGAATAACTTGGCTTAAACGCTTAGGCATGTTTGAAATGATTTTTTCTAAATATTCACTATTAATATTGTTCCATTCTTCTTGTACTCGAATTTT…	×
Halictidae	Lasioglossu	Lasioglossum albipes	Tigger	2699	582	1	1	22/22	1	CACCC/CACCC	DD30D	TA	ANOB01019014.1:1562-4264	CACCCGTCCCTCAATTTACGCGGCACTTTTTTTACGCGAGTATTTGTTTTACGCGGCGAATTTACGTA CTTACCTAATACATAAATTTACGTAATTTTACCTAAAGGACCCCGCACAAATCATATGGAAAATCGATTA TGGTTAAATCAGGTGGAGAGACCCTGGACGCGTGGATACAGTCGTGACGACATGTAAGATATAAAAAAAA TGGTCGTGCATGTAAATAAGCATCTCTTCGACGATGCTTTTACAAGTGATTGGTGCGACGAAGATGGAGA ACCGGACATTGAAACATAGGGTGGAGGAACAGAGAGAGAAGACTTTCGAGAAAAAATATTAAAAATACTA TTTTAAATAGTATACACCCGTCCCTCAATTTACGCGGCACTTTTTT…	×
Halictidae	Lasioglossu	Lasioglossum albipes	Tigger	3517	302	3	1	24/24	1	CAGTA/CAGTA	DD33D	TA	ANOB01034621.1:583-4103	CAGTAAATTCTCTATAATCGCAAATGCCTCGGGGGGATTTGTTTGCATTTATCGATCTTGGTCCTACTTTTTTCGAGCTTCAAAGGCCGAGCCGAACGTAGAGAAGGAACCAAAGGCCGAGCCGAACGTAGAGAAGGACAGCGCGTGTAACGCGAGACCACGCGCAGGTTTTTGAACTGTGCCGGCGACTGCGACTCTCCGCGTCTCTTTCTTTTCTAAACGCGCTATCCTTCCTTGCGCCCGAAACGTCCATCGTCATTTAAACCACTACAGTTTAAATACCATCGAAGGAAAACCATCGAATTGGAGCGTTTGCATCCGTCAGGAAAAGACACAATTTTTGTAGTTTGGCCTTCACGCCTTTGTCATGCTCAAGGCCCGTGAGGGTCCTAGTCGGAT…	×
Halictidae	Lasioglossu	Lasioglossum albipes	Tigger	3362	490	1	1	25/25	0.88	CAGTA/CAGTA	DD33E	TA	ANOB01014792.1:22939-26304	CAGTGATGTCCGGATCTATAGCCACGAGTCGAATTAAATGAACGCGTTGTTGAATTACAAACATATCGAAGCATGAAAAAAAAGTATAATCCTTTTATATTTGTCATATATTATTATAAAGTGGTCTTGGTGAGATTGCTAAGATTCTTACAATTAAAATGATTTCGGTCGCTAATAACCCGAGATGTTGATGCGACCTTAAATAAAATGCAACTTAAAAAAAAAAATGATACCAAACACACCTGTATTTGCTGATGCTTCTATTTGCTAATGAAATCAAATTTATTTTAACTAAACGAGTAATATTTAACGGAACAAATGGAAGATTTGCATATGCATTCAGAATAATTTCAGGATGATGATAATAATAATAATAATTTAAAGGTATTCTAGCAGCAC…	×
Halictidae	Lasioglossu	Lasioglossum albipes	Tc1	1287	345	320	2	29/29	0.9655	CCAGG/CCAGG	DD34D	TA	ANOB01023806.1:5865-7151	CCAGGTATGTAAATATGAAACCGGAATTTTTGTATAAACAATACACGTTTATTGTATGACAATGATACAAAATATTTTATTCAAAGTATTGCCCATTGGTAGCTACACATTTTTCCCATCTCTCTGACAATTTGTGGATGCCACGCCAAAAAAACTGTTCCTCTTTTGAGGCAAACCAGTCATCGAGACATTTTCGTACATTTTCGTAAGATGTGAAGCGCTGCTCAGCAAGTGCGTGTCCCATCGATGCAAATAAGTAATAATCGGGTGGAGCCAAGTCTGATGAGTAAGCCGCATGCGAAAGTATTTCCCAACTAAACGCCTCAATCGTTTCCTTTACCGGTTTTGCTGTGTGTGACGGTGCATTATCATGAAGCAAAACCACTTTGTGTTGCCTTT…	CCAGGTATGTAAATATGAAACCGGAATTTGCCCATAGGTGGCTCTAGCTGTCAATGTAGTTACCGTCAAACCGCGTCATTGACGCCATTTTCTTGTTTTGACATCTGGTAAAGATTTTCAACTCACAACCATACAAGTTTCATACAACAGCATAGTTTTTAATAACGTTGAACATGTCGAATTTTGTGCCTGGAAACTACGATATGCGGACAGCATTGATTTTCTGTTTCCATTTGAAGAAAACTGCTGCAGAATCGCATCGAATGCTTGTCGAAGCTTACGGTGAGCATGCTCTTGGTAAATCACAGTGCTTTGAGTGGTTTAAAAAATTCAAAAATGGCGATTTTGATGTGACAAACGAAGAACGTGGAAGACCACCGAAAAAGTTTGAAGACAGCG…
Halictidae	Lasioglossu	Lasioglossum albipes	Tc1	1608	337	4	2	37/37	0.8918	CAGTG/CAGTG	DD34E	TA	ANOB01022153.1:20240-21851	CAGTGAGCGAAATTCGTAGAAACGCACCTAAAAAAATGTGATTTTTGGGGCTAAAAGTTTTAAATTCA AATGAGGCGAATATAATAACGACAGAAGAGTAAAGATATATTTATGTGCTATAGATATTTACATATTTAT ATTTAGGTAAACATATATAAGTCTGTATTTATTGATACAGACTTATTCTTTGTGCGAAATTCGTTTAAAC GCACAGCAAGAAAAGACTATATAAAACTAAACTTATATTATAATTATAAATTTAATATTTTGTATGACCT CCATTATTTTGAATTAATGCAAAAATTCGATTCGGCATTGAATTTATCTGATTATTTATGACTGTAATAG GAATCTCTTCCCAGCAACGTTTAATTTCTTCTTTTAAAGCTGCAGT…	×
Halictidae	Lasioglossu	Lasioglossum albipes	Fot	3738	568	1	1	18/18	0.9444	CTGCA/CTGCA	DD35D	TAA	ANOB01004253.1:2534-6277	CTGCACCAGTGAATAAACGGGCACCAGTAAATGAACGCTTTTGTATATTTCAACAAATTTTAAGCCG CACGGTATACTGTTGATAATGACTCTTGGGCCAATGGAATATCGACTCTTTTTCGTAGCTGTATTCATAC TGTTTTAGGTTGATCACGTGACCATTAGTTTCTAAGATGGCCTATTTTCACCAAGTGCGTTGAGTCTGTG CAACAGAGCTAAAACTAGTAAGGTATGTATACACGACCTTTTCTTTTACACATGAGTTTTTATACTTTTC TTTTACACATGAGATAAAAGTTACTAACAATATGGATGTACGAGGGTTAAATATTGAATATAAATCACAA AAATAGCTATAAAATGAATATTTCGTTAAAAATTCGTTGTGTCTATT…	×
Halictidae	Lasioglossu	Lasioglossum albipes	Tc1	1252	123	6	×	28/28	1	CAGGG/CAGGG	DD37D	TA	ANOB01006425.1:5844-7099	CAGGGTGACAAGAAATAACGGAGTTAAACATTTCTTATTATAATTCTGTCAAATTGACGAATTTTGAA AAACAAAATAATAACAACAATAACATAGATGTTTAGTATTAATATATTTAAGACGTTTCGAAGTGGCGAT AGAGAGGCTCAAACGTGCTTTGAAATTTTCGGCAATGGGCCGCAGTTCTTCTGGCGTTATTCGGTTCTAC TCCCGGCGCAGAGATTTTTTTAATGACCCCAAATTTTTACGGAGCACAGGCCCTGGCCTCCAAAATCGAC CACACGCTGTAGTCCATCGGGTTGAGATCCGGTGAGTAGGGCGGCCATTCCGCAGATGTGACGATATCTG GAAAGTGAGCTTTGCACCACTCCTGAGTGTTTTCGCCCTGTGGGCC…	×
Halictidae	Lasioglossu	Lasioglossum albipes	Tc1	1205	151	17	×	17/17	0.8235	CTGTG/CAGGG	DD41D	TA	ANOB01013459.1:2623-3831	CAGGGTTATCCAAAATAGACTATAGGAAGTTTTTTTAAAATAAAAAACACTATTTTTTACTTAGTTAT CAGGTATCTATGACAATTATGCGTGAAAGACGATATCTGTCAAATGACCACCACGACCATATTTGCTCGT TTAGTCATGACATTTATGAGGCCATGAATTGTTGCTGGTTTGTTGGCATAAACTTTGCTTTTCAAATAAT CCCAAAGAAGAAAGTCCAATGGGGTCAAATCACACGAACGAGGTGGCGAATTCACATCACCATTCCTTGA AATTAATCGACCATTGAATTTCGATCGCAATAAAGCGATGTTTTCACGCGTTGTGTGTAGCGTAGCTCCG TCTTGTTGAAAATACACATTGCTTATGTCGATTCCATTTAATTTCG…	×
Halictidae	Lasioglossu	Lasioglossum albipes	Tc1	1410	100<	5	×	26/26	0.9231	CAGTG/TAGTG	DD36E	TA	ANOB01021197.1:19484-20893	CAGTGCTGTGAATAATTATAAACTCACATTTATTTTCTATGTTTACAGTTTCTTGCTATCTCTCCTTCGCGCAATGTAGTACATAGCTGAATGTTTCAAAACAAGGTGATTTGACCTGTGAATGTTTATAAACTCAATCGCTGTTCATACCTCATCCAAACCGTTTCTGAAGTTTTGTCAGATCTTCTCAGTGATAGTAATATTACAGCAAGTCTCTAAAAGTATTTTTTTGAGGATCTTTGAAACAATTCTGTACCGTACACTATGCCGCGTCAACGAATAATCTAGTATTTGAAGAGCTGCGGGAAAAGTCGACGACAAATTGCGAGTGTAATTAATAGATCCCAAAATGTAGTTAAAAATTTCTTGAAACTTGGTATTGAAAATTGCGGGAATATC…	×
Apidae	Lepidotrigona	Lepidotrigona ventralis hoosana	Tigger	1022	133	67	×	19/19	0.9473	CAGTC/CAGTC	DD30D	TA	NIPQ01105216.1:12339-13360	CAGTCAAACCTGTTTTTTTTTGTGCGGTAGATAGGGACCGAAAAAAAATATTGAAAAATTTCATAAATAGCTATAACAAATAGTTTTTTTACAACGTATTGAAGAAAATTTTTTTTATGTGGTGGAGAGGGACCGCAGAAAAAAAATTCACTTAGAAAATATGTCAAAGATTTACGAAATAGCGAGAAAGTGCTTTCCAAACGAAATAAATAATTAAATTACACATGGAAACATTTAAAAAAAATTTAATTTCTCATTTTGAACATCGGTAAATTTTCACACAATTAAACACTACTCGTCGTAATCCAAAACGTGCATCTTCTTGCGATGAACTCTTTCAAAATCGCTTTCGTCACTTGAACATGTTACAGTTGCTTTATTTTTTGTTACCATGAAGTC…	×
Apidae	Lepidotrigona	Lepidotrigona ventralis hoosana	Tigger	3351	368	1	1	16/16	0.875	CAGAA/CAGTA	DD33D	TA	NIPQ01092195.1:52587-55941	CAGAATAACGTTCCAACTTTAAATTTTATTTAAATAATGTTTAATTTAAATTTTAAATTGTTTAAGAAAAATTTGCATTTGCACGTTTTGAAAAGTGATTTAAACACATAATGTTTAACAGTACGAAATGACTAAATACTCGATAAATTTTAAAAATATTAACTATAAACTTTAATAATCTAAGTTAGCGATACATAACGATCAAATGACTTTTTTTTCAAGTATATTAATTAGACCAAGTGAAATCGTATGATCTATATTGTGATCTGTTTGTATTATGGACATATTTGTACATATTTGTATTATGGAAATGAAATGATCACGATGCCATTATATCCATATTTCGTTTCTTTTTTTTCTATATTTTATGCTCAACAAATTAATGAGCTTCTATTTTCA…	×
Apidae	Lepidotrigona	Lepidotrigona ventralis hoosana	Tc1	2381	156	3	×	34/34	0.8823	CTCCC/CTCCC	DD39D	TA	NIPQ01108352.1:565-2945	CTCCCTCTATCCGAAAATATGGTATATATTTTAATATTTCTTTTTGTCCGAAAATATGGTATACATTTGCGAAAAAAATCAAATAAAATTAAAGTTAAATATAAAAAAAATATTATAATATAACTAAATACAAATAGTTTTAGTATAATCCAAATTTAATTAAAGTGAGATTTAGCCTTGTTGAACGCTTCTTCTGAACATATATGCTTTTCAGTTAATGGACTTTCACGAAGTTTTACCTTACTTATATGAGGTGTTTTTTTCCCTTTATTGAGGTTTTTTTATTTCCCCCTCCTGTCAATATAATTGATTCCATACACGTTTGTAATGTTATCAAGAGTATTTCTCTCTAATTTATTAAATGCATCTCGTTGAGGTTTTTTTATTTCCCCCTCCTGT…	×
Megachilidae	Megachile	Megachile rotundata	Tigger	2510	538	4	1	24/24	1	CAGTA/CAGTA	DD29D	TA	AFJA01007957.1:10619-13132	CAGTAAAACCTCTTTTTGTGCGGTACTTTTTTATGCGATTTTATTTTTGTGCGATTTGTTTTGTGCGA TTTTATTTTTGTGCGTTTTTTTTCGTGCGATTTTTTTAATGCGGTATATGAACCTTAGCGGCGTTGGCGC CTGTTTAATGTTTCCTATCAGTGTACATATACATGTTGTGGGCGAACCCTGATTACGTGGGCTCCTTGAC GACTATGCATGTGTACTTCGCGACGCTCTGTTTATTTGTTTTAAACAATCTCCTGACAACGTACCGTCAA TTGAGTACGTATTTGTTAATTACATATTCTCGCTCGACGCGCGAACAGTATACGCTTCGTATTCGGAGTT TTATCCACGATTCACGTGATTAAGGATCCATTTTATAGTGAGATTA…	×
Megachilidae	Megachile	Megachile rotundata	Tigger	4213	230	3	×	25/25	0.88	CAGTA/CAGTA	DD30D	TA	AFJA01008289.1:2546-6774	CAGTATTGATTCGTAACAAGCAAATTTCTATCCCCTCTTCTTTGTTTGAAGTCGGCCGCTGAGTGAGAGATCCGAGAAAGAGTGAGAGGTCCGTGAAACCGAAAAAGTCATAAATTTTCACGGTCGACCGAACAGCTTAGTGGAAAGAGGACAGAACATATATATTGTTTTCTCACTCTGATACATAGCGATTCTGTCGTTCATTCATTGAATTCTACATTGATCCGTAATAAGCCACTCGCTCGGGTCTGGCCAGTTGCTTGTTACGAATCCGGTACATTATATTGTTTTCTCACTGTGATGCATGGCGATTCTATCGTATTATGAAAAGTATATTTTCCGAAATTATGTTATATCAATATGCTTTTTTTTTTTAAACTAATGGCTGACAGTAATCCA…	×
Megachilidae	Megachile	Megachile rotundata	Tc1	1220	153	4	×	27/27	0.9629	AGGTC/AGGTC	DD34D	TA	AFJA01002608.1:31902-33125	AGGTCATTAAGTATGAAATGTCCGATTACCTAAAGCCTCAAGTTTGATACCAATGTCTCCGATATTTC ACTTCGATCGTCATTTATTTTTTTTTGCATTGAGAAGATACGCCACCTGGCTTTCAGATGCACTCTTTTG TATTTAATAGTCTATCGTATTGTCGTCTGGAGTTTAAATATTGTAAGCCATGGACAAGCCGAAATGTTAA CGAAGTGTTTGGCAAGGATGTAGCTAACGAACGTACAGTACGTCGATGATTCGAAAAATTCCGATCTGGA GATTTTGATCTTCAATATGAACCACGCGAGCGGCCTGAGAGCAAGGTGGATGACAACCAACTGAAAGCTG TAGTGGAAGCAAATCAATCTGAAACGACGCGTGAACTAGCAGCAAG…	×
Megachilidae	Megachile	Megachile rotundata	Tc1	1650	342	7	1	125/125	0.888	CAGTG/CAGTG	DD34E	TA	AFJA01008780.1:1282-2931	CAGTGTGTCCCAAAACTATTCGTACCCTCACAACTTCCAACTATAAATGATTATTTGTATGTTTAACAAATCGTAACAAATATTTTATTGATTGGGTAAGATAATACATTTAATGAGCTTTCAATAAATATAAATTTTATTTCAAAACTAACCGTGCGGAATAATATAAATATCATACTGAGTAAATATGCTCGGAAACAGCAACATAAAAGTATTCGTACTCTTCAATTCTATGCATATAAGAACCAAAATATTTGCCAATACAGCTTTGTATTGATACCTATAATAAGGGAAATGATAGATTGGCCATCAGTAGACAACATTACGTTGACGGTACAATATTCTCTCGATAATTACCAAAATGAATCGAAAAGGTAGTGAAATTTCAATAGCAGTAAG…	×
Megachilidae	Megachile	Megachile rotundata	Fot	3560	807	2	1	24/24	0.9583	GGTAA/GGTAA	DD35D	TAA	AFJA01009589.1:44181-47746	GGTAAAAGTACCAGTAGTTGACCATGTACCAGTAGTTGACCATTTTGTTTAAAAAATGATGAAATAAGGTTTGTATAAGTTGTGCACTTCAGATGATAGTGATTTTTAGATGCCACGATATCTGTTGTCCAAATTTTGGAACAATTGCGCGTGAAGTGAAATGTGTCAATTAGCAGCGAATATCCGAGTGCAATAAGGTAAGTAATGTGCCGATATATTTCTATTTCCTTAACGATTCTGTTAAGAATAGCTGTATAGTCCAGATAAAAAATTTATATGTTATGAACATTTTGTGAATAAATCAGTTACTGTGTAAGCGCTTACAATGTTTTATCAATTTAATAAATACATTGTTTTTGTCGTTCTAACCTAAAAAAACAATAGTTTTTTAATGGTCAA…	×
Megachilidae	Megachile	Megachile rotundata	Tc1	1697	101	12	×	38/38	0.921	CAGTT/CAGTT	DD36E	TA	AFJA01009420.1:6473-8169	CAGTTACTCACTTTAATATTCGGACACTATAATAATTTATGTTTAATGCTTTATATCTTCCTCAATTGTTAAAATATTTTTTCCCTATTTTTTTACCATATTAACTTATTTATTACAGACAACAGAAACATAAAAAATTATTTTGTAACTGCCACATGTTATTACATATTGATGGATAAACCAAACGATGCGATGCCTACGCGTTACAAAAATATTCAGACACAATAAACGATTATTTCTAAGAAGCGATCTAATCCGTGGTATACGCCTAAAATGTAAACATAACAGTGGCGTTACCGCCCTACGTTAGTCTAAGTCAGTTTAGCTAAAGAAATTGAGCAATAGACATTAAATATTCAAAATGCCACGAAGAAGAAGAAACACAAGTTTCGATAAACG…	×
Megachilidae	Megachile	Megachile rotundata	Tc1	1189	114	2	×	28/28	0.9285	CAGGG/CAGGG	DD37D	TA	AFJA01010305.1:10170-11362	CAGGGTGCGGCGTCAAAATCCGGACAAATGAAAGGTTACATTCAAACATAATTTTTATTGCTAAAACG GAAATATTTACTACATTGTTAGTAAGGGTATAAAGAACTCATTTATTCAATATATCCTCCCTCTGCTTGA ATAACTGCTTCCAATCGTGGTCTGAAGCGCTTGCAGGCCCGTTTTAGTGCATCGCGGTCTATATCGGCGA ATGTTGCCTTGATAACGGCTTTTAATGACTCTATGTTAGCATGTCTGGATTTATTAGTAACCCTTTCAAC TACGCTCCATACATAATAATCCAAAGGATTTAAATCCGGGCTATTAGGAGGCCAAGATTCTTTCGACCAG AACATGTCGACGTTGTCGGACAGCCAATTTTGTATCAAATGACTCG…	×
Megachilidae	Megachile	Megachile rotundata	Tc1	1630	379	3	1	29/29	1	CACTA/CACTA	DD38E	TA	AFJA01007057.1:1381-3010	CACTACCGCTCATAAGTATGTGGACACTTACATTTTCTTGAATTCTGTGATACATATTATGTATTTTTATTATTAAACACTATTTGTTCATAAATTCTAATGTGAATATGAATGTAATGTATTATAATGATACTAAATTGTCAATTTAGTTGTTCAACTTTCTGAAATAAAGAAATGTCTGTCCGATCGGTGGAAAAGCGCGTTATATTGCGTTGCGCGCCTAGGGTTTGTGGGCCTTTTCTCTTGCAGTTTACAATGACTACATCGCTTAAGTGCGGTCTGTTGTCTTCTCAAGAGTAACGTAAACATTTGTAAACATGATTGCAAGTCGTGGAACCTTCGCTGTGACTTTAGCGATCTCTGCGATGCTCTGGCGAGATCAGTTTCGTTTAAAAAGTT…	×
Megachilidae	Megachile	Megachile rotundata	Tc1	1347	269	3	×	14/14	0.9285	TAGGG/CAGGG	DD41D	TA	AFJA01006478.1:1292-2642	TAGGGTGCGGCAGAGATACCTACCATATTTTAAAATGATACAGTGCCACCTATCGGTAAGTTAGCGAAACAACCCGATGCTCATTTGAAAGAGGACGGATGCCTATTTTATTCATTAGCACAGTTGATCGCCATGGCTGACTGGTCTGTCGAACAGCGCGCATATGCGGTTGAGTCGTATTTTCGCCATAACGATTCCTACATTCTAACGGTTCGCGACTTTCGAAAACGTTTTTCTTTAACCGGTAAAAAGGAGATTTTCACGCCAAAAACATTGAAGCTATGGGTCAAAAATTTCCGAGAGAATGACTCTGTGTGTAAAAAAAAAACCTCCTGGTTTGCCAAAAAGTGTAAGAACCTCGCCTTTGATCGCGCGCGTCTGAGAAGCAATTCAAAAAAG…	×
Halictidae	Megalopta	Megalopta genalis	Tigger	2466	202	2	×	24/24	1	CAGTA/CAGTA	DD29D	TA	REGU01001478.1:19858-22327	CAGTAAAACCTGTTTTTGTGCGGTGGATAGGGACCGTATAAAAGAAATCGTACAAAAAAATATTTGGA AATTTTATAAATACCTACATATAATAAACAACTTTGTTCGATACACTACCTAAAACTTTTTTTATGCGGC GGACAGGGGCCGCATAAAAAAAGTCGCACTTAGAAAACGCATCAATTATTTACGAAATAGATGAGAGAAT GTTTTCAATTAAATTAATTAATTAAATTAGACCTGGAAAAATTGTAAAAACATTTAATTCTTCATCGTAC ATACACATGGAGAAGTTTTCAAATTGAACATTAAATAGGTCGCTGCTACTCGCCGTAATCCAAAACGCGC ATCTTTTTGTGACGAATTAGTCCAAAATCGCTTTCGTCGCTTGACG…	×
Halictidae	Megalopta	Megalopta genalis	Tigger	2392	389	3	×	23/23	0.913	CAGGT/CAGGT	DD30D	TA	REGU01000473.1:11891-14278	CAGGTAGCCCTCCTACAACACGGCATCTTATAACACGTTTTCGCTATAACACGGTTCATAAATTGCGGGAACCCTCCTACAACACGGTTTCGCTCTAACACGATAAGAAAATTGCAAAAACCTTTGTACAGCACTGTACTTCTACAGCCACGGCGAGGCTTGCCGTCTTAAAGATACAGTGTTGCCACTGAGATGTATACATTTCTATCTCAGTGAGTGTTGCGGAAATTATTTATTTTCATCTCCGTGGCCTGAAAACAAAAGTGTCTCACACTACTGGTCGGCAGTCTGCGTCGAGCCACGGTGTGTGTGTGTGTGTGTGTGTGTGTGTGTGTGTGTGTGTGTGTGTGTGTGTGTTAATGTCTTTAAGACATTAAGCTTCAGTCCCAAGCTATGTTC…	×
Halictidae	Megalopta	Megalopta genalis	Tc1	1276	156	7	×	30/30	1	TATTA/TTAGG	DD34D	TA	REGU01002845.1:3241-4520	TTAGGGGGACCGGAAAGTAATGTCGTTTTCTTAAGTTAAATTTACACGACTACATTTTTAACAAGTTT TTATTTCTAATCAACAATATATTCACCTTCGTTATCAACAGCCTTTTGCCATCTAGTACACAAATTTTCA ATGCCGGAGCGGTAAAAATCAATCGGTTTTTCTGTAAAATATGTCGAGATAGCATTTTGGACATCATCAA AATTTTCTAATTTTTTGCCACTAAGACAATGTTGTAGTGATCGGAATAAATGGTAATCCAAGGGTGCAAT ATCGGGCGAGTATGGTGGGTGAGGCAGTACCTCCCACCCCAATTCGTTAATTTTGTCTAAGGTCCGTTTT GCACAGTGCGATCTTGCATTGTCATGTTGCAGAATAACTCCTTTTC…	×
Halictidae	Megalopta	Megalopta genalis	Tc1	1744	393	13	1	90/90	0.9889	CAGTC/CAGTC	DD34E	TA	REGU01001227.1:564680-566423	CAGTCGGTCACGAAAATATTCGGACACCACTATAATTTTAACTATTATAATCCGTACTTTAGACAAATATTTAAAAAGAACAAAAAGAGGCTTCACGTATGTTACTATGCAGTATGTAGTTAACAAAAACATAAAAAATATTTATTTACGATACGTGGTTATATAAATAATTAATGAAATATAGAAAGAAGGTCTATTTTAATGTCACGAAAATATTCGGACACCATGAAAATTAAATTTATTTTATTGTACATAAATCTTACTTTTATAAATTAATATTTCGTTGCATATCCCATCTGCTTTATGACGTGTCGCAATCGTGTTGGCATATTACAAATTATTTTTTTAAAATAAACTTGCCCAATACGTAGCCATTCTTCTTGCAGACGTCGTTTGAGT…	×
Halictidae	Megalopta	Megalopta genalis	Tc1	1302	361	3	1	26/26	0.9231	AAGGG/AAGGG	DD41D	TA	REGU01003523.1:1413102-1414403	AAGGATGTCACAAAATTCACGCAAGATTTGAATTTTGCGCCATTTGTGCGGTAAAGTGTTGCCAACCAAAAAAAATACAGCGTGACAGCTGACAGTTCAGGGTTATTAAAAATGGAGTGCTATACAAAAGAACAACGCATTTTTATTGTTGAGCAATATTTTGTAAAGAATGAAAGTTTTGCAGCAACAGTTCGCAATTTTCGTACAAAATATGGTCGGAATAGTGATTTAACTTCATCAACTGTAAAGAGACTAATTAAAAAATTTAGAGAGACTGGATCAATTAGTGATCTTAAACAGTCTGGCCGTCCTTCAACAAGTCGTTCAACACAAAACATTGAAGCAGTTCGAGAGAGTGTTGCTGAGAGTCCAGGAACATCAATTCGGCGCCGTGGTCAA…	×
Apidae	Melipona	Melipona quadrifasciata	Tigger	3028	422	1	1	16/16	0.875	CAGAA/CAGTA	DD33D	TA	LIRP01004397.1:841-3872	CAGAATAACGTTCCAACTTCAGACTTTATCTAAATAAAGTTTAATCTAAACTTTAAATTATTTAAGAAAAATTTACATTTACACTTACATTTGTTTTGAAAAATGATTCAAACACAGAATATCTAATGGTACAAAATATCTAAATACTCAATAAATTTTAAAAATATTAATTATAGACTCTAATAATCTAAGTTAACGATACATAAAGATCAAATGACTTTTTTTCGGGATAAGCATATTAATTAGACTAAATGAAATCGTATGATCTATCTCGTGATCTGTTTGTATCATGAACATATTTGTACACATTTTAAGCAAACAAGACATCTCTTATCTTTTTATCTTCTTATCTCATTTAATCTCTTATCTCGTTTGTTTGATTTTGTTCTTCAGAAAAAC…	×
Apidae	Melipona	Melipona quadrifasciata	Tc1	1331	102	38	×	30/30	0.9333	TTGGG/TTGGG	DD34D	TA	LIRP01028017.1:1388-2722	TTGGGTTGGCAACTAAGTGATTGCGGATTTCCTCAATAGATGGTCTTAACACATTCTTTTGTTTTGTC AACGTGTTCAAAACACCTAACCTATATTGTTTTCTTGTTGTTTGGACTTCCGCCTTTAATTTAGTAAAAC AATTGTATCGATTAGTTATTTAGTTCCGTTTTTATCCCAATTTAAACATGGAAGAACAAGACGCGCATTT CAGACATATTTTATTGTATTATTTCCGAAAAGGCAAGAACGCATCGCAAGCACACAAGAAGTTATATGCC GTATATGGGAATGAAGCCTTGGAAGAAAGGCAGTGTCAAAATTGGTTTGCCAAATTTCGTTCTGGTGATT TTTCACTGAAAAATGCACAACGATCTGGCCGTCCAGTTGAAGTTGA…	×
Apidae	Melipona	Melipona quadrifasciata	Tc1	1575	143	41	×	24/24	0.875	CAGTA/CAGTA	DD34E	TA	LIRP01021059.1:3189-4763	CAGTAGCTTATGAAAGTATTCGAATGCCTCCAATCTACATCTTTAACAAATAAAATGTACACGTTAGGTTTAAGTTTTTGAAATAAGATTGTATTTAAAGTCACATAGGAGTCTCGAGAATGTGTAAGTAAAATTACAAAAAAACCTGACAACACAGAATTTTGCAGAAACAGGGCATTGAGTGTAAACATACCGATTTCGGACGTCATAAAAGTATTCGAACGTACGAATAAGTCTTGAATTGTTTGATATTAATATCTGGTTGGTCATGCTTTGGCATCAATAACGTGTATCAGCCGGCTTTCCATACTGTATACAAGTTTCTTTGTTGCCTTTTTTTCAATGGAATTCCATATTTCTGTTATTTTGTTTTTTAACATTTCTTTGGTCGTTATGTCA…	×
Apidae	Melipona	Melipona quadrifasciata	Tc1	2236	207	1	×	96/96	0.8854	CAGGG/CAGGG	DD41D	TA	LIRP01014171.1:4864-7099	CAGGGTGTCAAAAAATGTTTTATCGTGGCTAGTATAGGTGAACTTTACATCCTCAGACCGATGGAGATCTGTCAAAAAATGTTTCCATAAAATTTTGACCTTGACCGACTTTTTCAAGGTCAAAAATTTTTTAAATCTTGGATCGTGTTCTACTTGTCACGAGAACCAAACTTGTCAAAGGAACCACGTGTTCTACTGCATTCGTTTCATCAGAAATTAATATTGGATTATTAGCATCTATGGAATGAATCTTATCTATAATGGCTTCATATTGTGAACTTGATTATAGACGGTATTAGACGTAGAAACTCGATAACAAATTATTGATGGACTCTAAAAATCACATAAACGCACTTTAGCTTATCTATTCCTCCTTTCCGATTAGTTTGTGCCTTTGTT…	×
Halictidae	Nomia	Nomia melanderi	Tc1	1285	145	32	×	23/23	0.913	TTAGG/TTAAG	DD34D	TA	REGV01000007.1:1963839-1965127	TTAGGTTGGTGCATATGAAATGTTGGATTTTTAAGTGAATATATAAAACTGCATATCTTTTTTTAAAA GCTGCTTATTTAATTAAAATATGCTCCATTTTCTTCAATACACTTTTCCCAACGAGATTTTAATGCATAA ATGCCTGTCTTAAAGAAATTCTGATCTTTAGAATCAATAAACTTTGATACGGAATTTTTCAGGCCGTCTT CATTTTCATACTGTTTAGCCCGTAAAAACTGTTCTAAATATTTAAAAAAATGAAAGTCGGATGGCGAAAG ATCCGGTCAATAAGCTGGGTGCTGCAAAATGTCATATTTTAATTCATTTAATTTCGCAATTGTTTGGTAC GGCGTGTGCGGCCGAGCGTTGTCATGAAGTATTGGGCCATGCCGAT…	TATTAGGTTGGTGCGTATGAAATGTCGGATTTTTAAGTGAATATATAAAACTGCATATCTTTTTTCAAAAGCTGTTTATTTAATTAAAATATGCTCCATTTGCTTCAATACACTTTTCCCAACGAGATTTTAATGCATAAATGCCTGTCTTAAAGAAATTCTGATCTTTAGAATCAATAAACTCTGATATGGAATTTTTCAGGCTGTCTTCATTTTCATACTGTTTAGCCCGTAAAAACTGTTCTAAATGTTTAAAAAAATGAAAGTCGGTTGGCGAAAGATCCGGTGAATAAGCTGGGTGCTGCAAAATTTCATATTTTAATTCATTTAATTTCGCAATTGTTTTGTACGACGTATGCGGCCGAGCGTTGTCGTGGAGAAGTATTGGGCCATGCCGAT…
Halictidae	Nomia	Nomia melanderi	Tc1	1872	118	3	×	70/70	0.8571	CAGGG/CAGGC	DD41D	TA	REGV01000308.1:150239-152110	CAGGGTGAATCACGAATCGCGATCAGTAGAAATTACTCTGTTATTAGCAGTTCGATCGAAAATGTTTTTATCAGCTTTTGCATGGTTTCAAGAGAGCTTTAACGTGATTATAAAAAATTATTAACTCTTTTTTTTATGCCTTTTCAAGGTCACCTTGAATTTTTTGCAAATAAACATATAATTTTTTACGACTATCTGTTAGAGGATGTCAAGATGAATTCGGTAAATATCGGAACATAACTTTTTTTTCATCTGGGCCGAGAAAAAATTAAAAACTTTTGTATTGCAAGGAGTATCTACGCCGTTGTACGCGTTCCAATGTTGTTGACAAATCGAAATTTACCAACCTTAATTGTAGCGATGTTCAAAATGGTGTTCACGAGCTGCAATGCACTCGCA…	×
Halictidae	Nomia	Nomia melanderi	Tc1	1268	310	11	2	35/35	0.9429	CACTC/CAGTC	DD34E	TA	REGV01000202.1:2223064-2224331	CAGTCTGTTTGACAAGAGCGTGTACGGCAAAACTCTTACCTGCGATGCCTTAGGTAAGAAATTCCACTTCAAGCAGGTAACTTGAATGTTTCCCTAAGATGCTTTGTACAAAAAACCCTCAGTTGTTGATCGAGTTTATTCGTAAAACGACGTATTTCATTATGAGTGCCGCGTACGCATCACGTTACGAAGCAGTGTTTCTGTGTTCCCATCCTAAATGACCAAAAATGTCATACACAGCGGCTGCTAAATACATGAAGAAATCGAAGACATTTGTTAGTAAGTGGGTGAAACGATATTTGGAGGTCAAAAACGTCGATGACCTACCAAATCGTGGCACTAAGTCAAAGACGACGAAGAAAGAGGATAAATTGATTTTACGCGAATTCGAGAAGAATC…	×
Megachilidae	Osmia	Osmia bicornis bicornis	Tigger	2386	536	7	1	10/10	0.9	CAGTT/CAGTC	DD30D	TA	MPJT01000391.1:25733-28118	CAGTTTTGATTTGAAATAAGCAACTGGTTTCAGGTAATATAAATGAAAACGTAATGCTGGAAAACATGTTTCAAAAATATCTGTTGCGTAGCACGCTTTTCCGACGCGTAGTGCGATTTGGCAGGAATGGTCTTTTTTCGAAATTTGGCAACACAGGAACGTTTTCTAGGGCCCGAGGTCCGTGGCGTGACTGACCGCGGGTCATTTCATCCTGTGTCGAGGACCCTTTTGGAGAACTCAGGGTTTATGACCTTACAGTTTCCTGTAACAACAGTGACATGGCCTTTAACGTTTACACGTCATTTCTTTTTCGGAAAAACCGAGGGGTCTTTACCTGAAACGGGACACAAAATTTGTACCTACAATTCTCAGTTTGTCAGTCTTTTCACAACCGTTGAG…	×
Megachilidae	Osmia	Osmia bicornis bicornis	Tigger	2682	459	11	1	27/27	0.9629	CAGTA/CAGTA	DD32D	TA	MPJT01000415.1:11219-12900	CAGTATTGCCTCGAAATAAGCAAGTGGTCTCGACTTCGAAATATGTAAGCAAGTCGCTATCCCCTCTTCTTTGTTTGAAGTGAGAGGTACGAGAAATGAGTGAGAGGTCCATGAAAGCGCGAAGCCGATGTTTAGGGTAATAAATTTCACGCTCGGCTGAGCAGTGACATTGGTTAGTAGAAGAAGGATGGAATATATATAATGCTTTCTCAGTCTGGTATATTTGCTTCGAAATAAAGAACTCGCTCCGGATGATACTGACATACTGGGATATGTATTAACTGTGAGTAACAACAATATACAAAATATACAAAATATACAAAATATACAAAATATACAAAACTCCTTGTCGATACGCCAGTGAAAAAGCTGATGTCCTGTAAAAAAATTATAATTAAC…	×
Megachilidae	Osmia	Osmia bicornis bicornis	Tigger	3112	338	4	1	27/27	96.3%%	CAGTA/CAGTA	DD33D	TA	MPJT01001979.1:1626-4741	CAGTAAAACTTGGATATATGCAACAAACATTGGGACCCAGGCGTTGCATATATCCAGTCGAGGTGTCG AATCTCGGGTTACACGCGACGAGCAGCCAAGCGTGAACGTCGAAAAGGACAGACAGTGGTGGAAAGAGAG AGGTCCGATGATCAAAGGAAAGAGCCGAAACGTATCGGTGTGACAAATACTAATTCAACTATAAAACTTT TTTATTTTTGACTTTTTTTTACTGAAACTTTTACTAACGCATTGGTGAAATTTTTCTGATTAAAATGATA CCAAACACGATATAGTTTGAATTATAATTACTTGCTAAAATTCATGTTAAAAGTTGGCGAAAAGCAAAGG TGGATTGGAAATAAAAACCGGTTGCGGCGTCGGCTCGGGTTTCAAA…	×
Megachilidae	Osmia	Osmia bicornis bicornis	Tc1	1286	341	1	1	30/30	0.8667	TGGGT/TTGGT	DD34D	TA	MPJT01000389.1:11868-13157	TTGGTTGGCAACTAAGTGATTGCGAATTTTAAATAAGAAGGAGAATTCAAAATTTTTACTTTATAATA TAACTTTATTAAATTAGGTAATGTCCGTTTTTGTCAATAACCTTTTGCCATCTTTCAGGCAGTTTCATGA TTCCATTTTCATAAAATTGCTGATTTTTGCCAGCAAAAAACTGAATTAAATAAGATTTTACATCTTCTTC GTTATTAAAAGTTTTACCATTTAAGGAGTTCTGCATGGAACGAAATAAATGGAAATCTGACGGTGCAAGG TCCGGGCTATAAGGTGGATGTGGTAACACATTCCAACCTAGCTCCAATAATTTTTGGCGAGTGATCAAAG ATGTATGGGGCCTTGCATTGTCATGTTGAAAAATAACACCCTTACG…	×
Megachilidae	Osmia	Osmia bicornis bicornis	Tc1	1659	400	4	1	137/137	0.9489	CAGTC/CAGTC	DD34E	TA	MPJT01004519.1:300-1958	CAGTCGGTCACGAAAATATTCGGACACCTCTATAGTTCTGACTATTATAGTCCGTACTTCAGAAATTTATGCAATAAGAACAAAAAGAGGTTTCACGTATGTTACTATGCAGTGGGTAGTTAACAAAAATATAAGAGATATTTATTTACGATAAATGATTACATAAATAATAAAAGAAAAATGGAAAGTACACTCATTTTCATGTCACGAAAATATTCGGACACTTGCAGTACTTCTCAAGTTTCCAGGTTCCAGGAACTGACTGAAACAATGTTTGTAAACATATCATTCATACTATGTACAGAGTATGTTAGAGATCGAATATTTGTCAGTCTTGCTCAAAATTTGTGCAAAATGGGTCGTAAAAGTAAGAACACGTCGTTTGATATGCGACAATTA…	×
Megachilidae	Osmia	Osmia bicornis bicornis	Fot	2158	294	2	1	25/25	0.92	GGGGA/GGGGA	DD35D	TA	MPJT01000212.1:172903-175064	GGGGAAGGGTGGGTAGCCCCGGACACTTGAATAAAATACAAAAAAAACATAGAAGCAATCAATTTTAATCAAATTTCTCTTTCAGGTAATAAATATAGGGTCTATCTGATTCATTTTATCATAAAAAAAACCATATTTTTTAAATAACTTTTTAAATAAATCTGATTCATTAATACTTGCACATTGTTCATATGCCTAATCGTTATGAGTGATAGCATTGTATCAAATCTTCTTGGATTGTTTCTCCACAAACGATGCATTTGTGATGCTCTTGATTTTCTTGATTGAAAACATTTATTTTTCGTTTTCCTTTGCTTTGATTGTTTTTGATAGTTCTCCTACTTTTCGCGATAGTTTCATCCTTATAGGGAGACGATGTCAAAATTTCACTTCGCTGTG…	×
Megachilidae	Osmia	Osmia bicornis bicornis	Tigger	2302	477	2	1	21/21	0.9048	CAGTA/CAGTG	DD36D	TA	MPJT01000592.1:9535-11840	CAGTGATACCCCGCTTAACGCGGGGAATACGTTCCAATAAGTTCCAGCGCTAAACGAAACAGCGTTAAACGAGGTCATCTTAGTACGTAAATAATGGGGATAAGTGAAACAGAATAAAGAAAAAGAAAATTTATCAATTCTTTTTTTGTTTTATTTTGTAACATTTATCGTTAAATAGTTCTTTATTACATCAATTATAGACTTATTTATTGCTAATATCCATTTTTATTCATAAAACATTCATGAAAATCAAAAAAGGTTCGAATAAAGATGTCATGTTTGTGACGAGGAAGATTCTTCGTCATTTGATATTCTTTGTTTTTTTGTGAAGAAGTCGTCTAAAATCGTTTGTCTTTTCCTGTTTCGTTCAGTAAGCAATTGTCGATAGCAAGACACCGC…	×
Megachilidae	Osmia	Osmia bicornis bicornis	Tc1	1232	100<	24	×	54/54	0.8333	CAGGG/CAGGG	DD36E	TA	MPJT01000196.1:178960-180191	CAGGGTGGCGCAAAATGAACTTTTTGGTTTGACTTCGTAATAATTTTTTTAATTTTAGAGTGAAATAAATACATATTGGAAAAAAATATAGTGTACAGAAGAGGAATTTTATTGAACTAGACGTGAAAGATTATATCTCGCAAATGACCGCCATTTTCTGTTTGACACATTCGTGCTCTTTCTAACACATTTTCCATGACTTTTCGCAAAACTTAAAGTGTTATTGCACGGATTTCATTGCGAATATTGGTTGTCAGTTGGAGGATGGTCGCTGGCTTATTGACGTACACTCGCTCTTTCAAATACGTCCAAATAAAACAGTCGGGAGCGGTTAAAAGTCGATTTATATTATCCGTTCAGACACGGGCCGTTTCCGATCAGTTAGGTTCCGACAAATAT…	×
Megachilidae	Osmia	Osmia bicornis bicornis	Tc1	1695	215	5	1	187/187	0.9518	CAGGG/CAGGG	DD37D	TA	MPJT01001730.1:5420-7114	CAGGGTGATCCTCTCGCTACGCTACCCAAAGCAAGCGCCGCCTGAATAGAATGTGGTAGTCTACATCCTATTTCTGTCATTGCATACATGACCGTCGAGGCCCCTGCGGCGAGGACGGTTGTGTGCGTGGAAATCTGTGTTCTGAGCAGGCCAGACCCATTTAAACGTTGCGGAAAACAGAATATTTTCTGAATGGTTACGCTGTACGAGTAAATTGAAATGATGTACGAGTTTGTTACTTCCTCGTACATCTGGATAAAAATAGAAGCTCCGTGTAGGCACTGGAGGGTAACTTTTTACCTGCAAGGGACCGGTTAAACGGTGGTAGTTATTTGTCTAATGAATTCATACTTTCTCTTTTATTGCCTAAGTGCATTTCGTTGGTCAAATTTTTGTCCC…	×
Megachilidae	Osmia	Osmia bicornis bicornis	Tc1	1887	348	4	1	149/149	1	CAGGG/CAGGG	DD41D	TA	MPJT01001501.1:437-2323	CAGGGTGGCCCACATAACTCTTAACAGCTCAATATCTCGAAAACTATCACATCGATTTTAAAGTTCTTGGCCTCAAATTGCATGGATCTGAAGGGCCTTTCTAACTACATAAACATGATGTGGCCCACCCTTCTTCTTTAATGGGGGGGGCGGGGGTACCTTTATAATTTTAAGTGGAACCCCCTATAAAACGTTACATATTTAGATTCTACAGGAAAAAAACAAGTAAATTTTGTCTGAAACATTTTTTGTCAGATATTTCCATGATGAGATTATAACAGTTTGAAGTTTCGACTTGTAGGTACTTACTTGAAGCGGTCGGAAATAGCGTTATTGAATTATTATTGAGTCCTTTGCTTACTCGTGAATAAATAAAATGTTCCTTAAATTAAATGTTCA…	×
Megachilidae	Osmia	Osmia lignaria	Tigger	3409	275	3	×	21/21	1	CAGTA/CAGTA	DD33D	TA	JAAOZW010000028.1:118908-122320	CAGTATAGACTCGTTATAAGCAAAACGCTCGGGACCGGACTTTTGCTTATAACGTGTAGTTCCACCATTGTTTGATATTTGCCGACTGCTTCGAACGTAGAAAAGAACCTTGAGTGAAAAAGAGGACAGAGCGAAAACAAACCGTTCTATGTCGGTGAGGCAACTTAATTTTGTTATTTTTCATTTTTTTTTTATAAAACTTTTTCTATAACATTTCTGACATTTTTCTAATTAAAATGATACCAAACACGATATAATTCGGACCATATTTACTTCAAACAACTTATTATGTATCATTATCATTTCTATTAAATTAGAAAAAAGTTTTATCTCAAGTATCTGTTCAATCAGCTACAGTATCACAATAACCAGTTTTTATTAGATTATATAAATATTTGT…	×
Megachilidae	Osmia	Osmia lignaria	Tc1	1277	345	4	1	29/29	0.8966	CCAGG/CCAGG	DD34D	TA	JAAOZW010000057.1:72579-73865	CCAGGTATATAAATATGAAATCGGAATTTTTGTATAGAAAATACACGCTTATTGTATGAAAATGATAAAAAATATTTTATTCGAAGTATTGGCCATCGCTATTTATACATCTTTCCCATCTCTCTGATAATTTGTGGATGCCACGCCAATAAAACTGTTCCTCTTTTGATGCAAACCAGTCATCGAGCCATTTTCGTACATTTTCGTAAGATGTGAAGCGCTGCTCAGCAAGTGCGTGTCCCATCGATGCAAATAAGTGAAAATCAGATGGAGCCAAGTCTGGGGAGTAAGCCGCGTGCAGAAGTATTTCCCAACTAAATGCCTTAATCGTTTCCTTGACCAGTTTTGCTGTGTGTGATGGTGCGTTATCATGAAGCAAAATCACTTTGTGTTGCCTTT…	×
Megachilidae	Osmia	Osmia lignaria	Tc1	1671	110	2	×	105/105	1	CAGTC/CAGTC	DD34E	TA	JAAOZW010000049.1:7618054-7619728	CAGTCAGCCGCAAAAGTATTCGTCCATGTACCGTATTCGATGTATATGGAAGAAATAGAAGGCAAATA AATGTACAATTTTTCATTTAAAGGTATAGAAGTAAACCTTTATTTACGTAAAACAAGATACCATTCGCGA AAGTTGATAAATGTCATACAGAAAGAAAAAATTAAGGAATATGTTGCGGTATGTCAGAAAATGGGACCGC AAAAGTATTCGTCCACGAACTATTATGTTAAATAAAATACTTGAATTCGTTTAAAACAAGCGAAAAACAG CATTCTCAGTAGTGATTATGTTTTGTCAACTAGCAACAATTCCGCACAGTCCGTCTTCAATAAGCATGCA ATTAATATCCACCATGAATCGCAAAAAATGTGAAACATCTCTATCC…	×
Megachilidae	Osmia	Osmia lignaria	Fot	3173	369	1	1	24/24	1	CTGTT/CTGTT	DD35D	TA	JAAOZW010000053.1:5397-8573	CTGTTCGTTGCTGGTAAGTTGCCGAGCACCGACAAACTGATCCGACGGAGGGGCAAGGGGACTGTGAG TTCGCTCCACCTAATCCCCTCCAGGAACCCACAACTTGAGAAGTCAGCGGTCACATTGCATAGGCGTAAA ATTTCCGTATTCGCGGGGGATATTAATGGATTTTTTATAATATTCGTTCTTGACAACAGTTGTTATTACG CAAAATTTATGGTAATTGCATTATGGAAAGTGTAAAAACTGCTGTTTTCTTAATAATGTAAATCCCGAAT TTACGTCTACGTCAATGCGTCCGAATCGTCGCTTGCTAACGCTTCATCTCATTCCGTTTCAATGTCTGTC CTTAGCGACGTTCGTCACGCGATAGATTTGTGGATGTAAAAGCCTC…	×
Megachilidae	Osmia	Osmia lignaria	Tc1	1312	344	1	1	31/31	0.9677	CAGGG/CAGGG	DD37D	TA	JAAOZW010000117.1:32228-33539	CAGGGTGCGTAAAAAGTTCCCGGAATTTTTTAATGTTTGTTTCCGCTTTTTGTAAAATCTGTTTACATTTTTATGTTCTTCATGAAATTTTGATACAGGGAGCATTTTTAAGTTATTTGTTTATTTTCAGTTAAGCGAGCTATGAATTACAGAAGTGAACGTACCACCATCGTTGAATTACACAAACGTGGAATGAAGACGGCAGAAATTGTTCGCACGACGGGATTTAAGAAGTCGACTGTGTACGATGCCGTGAAACGGTTCAAAGAGACTGGCAAAACTGTGGATCGTCCTCGTAGTGGTCGATCAGCTACAGCAGTAACGCCAAAGAACGTTCAAAAGGTCCGTTGTCGAATTTCTCGAAATTCGGAACGCTCGATGCGTAAACTCGCAAAAGAC…	×
Megachilidae	Osmia	Osmia lignaria	Tc1	1702	325	4	1	180/180	0.9722	CAGGG/CAGGG	DD41D	TA	JAAOZW010000054.1:26487-28188	CAGGGTGATCCTCTCGCTACGCTACCCAAAGCAAGTGCCGCCTGAATAGAATGTGGTAGTCTACATCCTATTTCTATCATCGCTTACATGACTGTCGAGGCCCCTGCGGCGAGGACGGTTGTGTGCGTGGAAATGTGTGTTCTGAGCAGAAGAGACCCATTTAAACGTTGCGGAAAACAGTAAATTTGTATATATTTACCTTTTTATTTTTACATCAAATGCTGGAAATGGTCCCCTCCAGCGTCCAAACATTTTTGAATTCGTTTTTCCAAATTATTGAACACTAAAATCAGCGTATCTTCGCTAATATTTTGTATCTCTTGTTTTATATTCGATTTTAATTGTTCTCTTGTCTCTGGTTTATTGTGGTAGACGCGCCCTTTAAGGAAACCCCACAAG…	×
Megachilidae	Osmia	Osmia lignaria	Tigger	2568	572	2	1	24/24	1	CAGTC/CAGTC	DD30D	TA	JAAOZW010000012.1:157941-160508	cagtcaaccctcctataacgcggtactctcagaacgcggtttccatataacgcggagctgaaaatgcgacagccctcctataacacgatactcttacagcgcggtttccgtcaacagcatcacataagttccttccgcgtagcctaagaatgtttagcctatgtttagttcgttagggcctatttgaattataagggaacagatggcgccagtttcatgtaggtccaggcagtcggatcgcgacatagtaactagatatgtttatataaagattatctccggcttatctgatagccgtctacgacatcggttttagtcttctcagagctctttcacagtgtacacgttttgttggtgaccaagtctttctaaaaatttttctgcaccgtccgttcgttc…	×
Megachilidae	Osmia	Osmia lignaria	Tigger	2490	127	6	×	23/23	0.7826	CAAGT/CAGGT	DD31D	TA	WIUU01013588.1:3328-5821	CAAGTAGCCCTCCTACAGCACGGACTTTGCGTCTTACAACACGGTTTCGCTCTAACACGATAAAAAAA AAATTGCGAAAACCTTTGTTCAAAAACACTGTACTTCTACCGCACTACAGATAACATGATTTTTGTTTAA CACATTTAACGAAACTAAATTACCTTCAAAAAATGACGGGAAGGAATAATGAACTATAATGGCTTTAGAT GAAAATGTATAAATGTACAAATTATAATTTATTGATTTATAACTCTATCCCGAGGTCATAGCGGAAAGCG TCATGCACAGTTTACACGCCATCCGCGGCGAGGCCGTATCTAAAAAGGATAAAGTGCAATGCGATATCGT CGTATCGTATCGATTTGTTGTAAAATGCGATCGCTGCCGAGGGCCC…	×
Megachilidae	Osmia	Osmia lignaria-1	Tigger	3636	486	8	×	24/24	1	CAGTA/CAGTA	DD33D	TA	JAAOZW010000042.1:7173546-7177185	CAGTAAAACCTGGATAAATTCAACGAAAGAATGCTTGGATAAATGAAACATCGCTATCCCCTCCACTTGGGGGGATCCCCCTAGGCGAGCCGAGCCGCTCGACGAGGAAACCGTGTAATATGATCCGACCGTAATATCCGTGTGACTAATACTAATTCAATGATAAAACTTTTTTATTTTTAACTTTTTCTCAATGAAACTTTTACTAATGCATTTGTGAGATTTTTCTGATTAAAATGATACCAAACACGATATAGGTTGAATGATATTTATTTATTAAAATAATAATAAAATGGTACATTATAATAAAAATTGTCATATATTGAAATGAATAAGGTTTGAAGGATAAAAAATAACGCATCAAAAGTTATGGAGTTCGTTGACAAAGGGAAGATGCAG…	×
Apidae	Tetragonula	Tetragonula carbonaria	Tigger	3376	369	1	1	16/16	0.875	CAGAA/CAGTA	DD33D	TA	WIUU01000499.1:19039-22418	CAGAATAACGTTCCAACTTTAAATTTTATTTAAATAAAGTTTAATCTAAATTTTAAATTATTTAAGAA AAATTTGCATTTGCACGTTTTGAAAAGTGATTTAAACACATAATGTTTAACGGTACGAAATGACTAAATA CTCGATAAATTTTAAAAACATTAACTATAAACTTTAATAATCTAAGTTAGCGATACATAATGATCAAATG ACTTTTTTTCAGGGTAAGTATATTAATTAGTATATTAATAAGTATATTACCAAGTGAGATCGTATGATCT ATCTCGTGATCTGTTTGTATTATGGAACTGAAATGATCACGATGCCATTATATCCATATTTCGTTTCCTT TTTTTTCTATGTTTTATGCTTTATCTCAACAAATCAATGAGCTTCT…	×
Apidae	Tetragonula	Tetragonula carbonaria	Tigger	2507	482	1	1	19/19	0.8947	TCCCC/TCCCC	DD33E	TA	WIUU01016216.1:1655-4165	TCCCCACCAATTTTTGGAATTGTGACTATCCCCGCTCTACGTTATCTTATCACGCAGCCGGTATGCAT CTCGTACACGCAAAACAAGCGATATATGTATATGATACCGATATTAGCTTGGCATCGGTGAAACAGTGGC GCTCTCCCCACTCTTTCTTTTGATGCCTGGAATACACCTCCCCTCTTAACTGACCAGTTTCAGTCCCGAG TGTTGGACAGTTGCGAGGTCACTGCTGTATCGTGTATTACATCAATCCAAATTAATATACTGAACTAATC GATTGACGCAATATTTCTTTAATGAACACATTCTGTTTTCAAACACACCGTTCAATAAACCGAGATATGT ATCACCTACCTACGGGTAGATACAATAATTTGTGGACACTTAAGAA…	×
Apidae	Tetragonula	Tetragonula carbonaria	Tc1	1321	173	6	×	14/14	0.8571	CCGGT/CCGGA	DD34D	TA	WIUU01000657.1:15607-16927	CCGGTAAGTTCTGTCCGTTCCGGTTACAACAAGTTTCAAACAAGTATGCGCATTTTCATTTGACGCATATTTGGCTCTCTCTTTTTATCTAGCGGCTTTAACGTCGAGTCTTTGAGGCCACTTGTTTTGAACTTCTCGGCTGTTGCGCGAAGTGTGCACTTGTAGAATAAAGAGAGAGAGAGTGTGAATACATACTGACCTAGCAAATGAACTAAAACGAAGATGATTCACGTTAATAAGTGAGACGCGATCGTGTACCCATGGCTACTGATAAAGTTCATTTACGCCACTGTATTTTTGTACGAATTCCAACAAGGAAGAAATGCTACAGAAGCGTGTAGAAATTTATTGAAAGTGTTTGGTGAAGGTACAGTTTCTGATAGAACATGCAGAAGATGG…	×
Apidae	Tetragonula	Tetragonula clypearis	Tigger	3465	457	1	1	22/22	0.9091	CAGTC/CAGTC	DD29D	TA	WIUT01004832.1:1108-4576	CAGTCAACCCTCTTATAACGCGGTACTCTGAAAACGCGGTGTCCATATAACGCGGAGCCAAAATTGCG ACAACCCTCCTATAACGCGGTACTCTTATAACGCGGTTTCCGTTCAACAACATTCCATTCCTTAATTGGT TTAAGAAGATTCTCTATAGCATGAATTTATCTATGTGTCAAATTTTTACAGTTGAAATTAACGGGGAATT CCCTTCTTTTTGGTGAAGGTACATCACCATTTTCCAATTTTAGTTATCAGGGAATTCCCCTATAAGCGAA GAAACGATGCGAGATTGTTTACAGTGCTTTGTTTTAATGCTTAAAATAGACCTTATGATTGATTGTTGCA TATTTACGTGAATTTTTTTATCCAATAGCGCTGCTGAACTTTCATT…	×
Apidae	Tetragonula	Tetragonula clypearis	Tigger	3340	422	1	1	16/16	0.875	CAGAA/CAGTA	DD33D	TA	WIUT01011299.1:742-4085	CAGTATAAAGTTCCAAAGAATTGACTTTTGAAATGTAAATAAAATATATTTAATTTTGCACAAGAATC AGTTCATGTCCATATAAATATTTACGTATATAGAAGTAAAAATAAAAAAAATATTTTTATATAATTTTAT TATAAACGTTTCATTACAAAATTAATAACAAAATATAAAAAGAAGAAAGATAGAAGTCCAACGAATAATT TATATCTTTTGTTATTTCAAATACCGGAATATTATATTACAATATAATACACATACTTGAATATTAAATA TTTAATTATCGTAATAAAAGAAAATATAGAAATTTGCAAGCTACGAATAAGGGTATATAACAATAGTTAT ATAGAAATAATCTTGACGATAAGGCGTATATTATGTATGATTTAAA…	×
Apidae	Tetragonula	Tetragonula clypearis	Tigger	2574	486	1	1	22/22	0.8636	TGCCC/TTCCC	DD33E	TA	WIUT01013614.1:357-2935	TGCCCATCAATTTTTGGAATTGTGACTATCCCCGCTCTACGTTGTCTTACCATGCAGCCGGTATACATCTCGTACACACGAAACAAGCGATATATGTATACGATACCGATGTTAGCTTGGCATCGGTAAAACAGTGGCGCTCTCCCCACTCTTTCTCTTGATGCCTGGAATACAACTCCCCTCTTAACTGACCAGTTTCAGTCACGAGTGTTGGACAGTTGCGAGGTCACTGCTGTATCGTGTATTACGTCAATCATCGAATTAATATACTGAATTAATCGATTGACACAATATATTTCTTTAACGACACATTCTGTTTTCAAACACACCGTTCAATAAACCGAGATATGTGTCACCTACCTATACGGGTAAATACAATAATTTGTGGACACTTATGAA…	×
Apidae	Tetragonula	Tetragonula clypearis	Tc1	1223	175	7	×	18/18	1	CCGGA/CCGGA	DD34D	TA	WIUT01001323.1:20678-22305	CCGGAAAGTTCTGTCCGTCTTTTAGAACAAAACGAAATAATAAATTTTTCATACCTCGAATAAACTTTATTGAATAATATAACTTCCATCATTATTTATGACTTCTTGCCAGCGTGATGGCAATTTGTATATCCCATTTTTAAAAAATGCCTTATCCCTAGAGGCGAAAAATTGAACCAGTGCTTGTCTGATATCTTCTTCGTTTTTTGAATTTTTTGCCCTTCAAAAAATTTTGTAAGGACAGAAACAAGTGATAATCGAAGGGTGCTAGGTCCGGGGAGTATGGCGGATGCGACAGAATTTCCCAGCCTAGCTCTCTCTAGCGAGTTTCTGACGAGTCCCCAAAGCAGTATGTGGCCTGGCATTATCATGAAGCAGTATGATGTCCTTAACATCGCC…	×
Apidae	Tetragonula	Tetragonula davenporti	Tigger	3464	198	1	×	22/22	1	CAGTC/CAGTC	DD29D	TA	WIUW01000166.1:17359-20826	CAGTCAACCCTCCTATAACGCGGTACTCATAACGCGGTTTCCGTTCAACAACATTCCATCAACTTAATTGGTTTAAGAAGATTCTCTATAGCATGAATTTATCTATGTGTCAAATTTTTACAGTTGAAATTAACGGGGAATTCCCTTCTTTTTGGTGAAGGTACATCACCATTTTCCAATTTTAGTTATCAGGGAATTCCCCTATAAGCGAAGAAACGATGCGAGATTGTTTACAGTGCTTTGTTTTAATGCTTAAAATAGACCTTATGATTGATTGTTGCGTATTTGCGTGAATTTTTTTATCCAATAGCGCTGCTGAACTTTCGTTGTTTCAACCACCTTTGTCATCAATTTTAAGTGCAACTTAGTAGGAAACTGTCTGTAAATCCGTGCAGACGT…	×
Apidae	Tetragonula	Tetragonula davenporti	Tigger	2558	136	6	×	23/23	0.8261	CAGGT/CAGGT	DD31D	TA	WIUW01012758.1:3304-5865	CAGGTAGCCCTCCTACAGCACGGACTTTGCGTCTTACAACACGGTTTCGCTCTAACACGATAAAAAAAAAATTGCGAAAACCTTTGTTCAAAAACACTGTACTTCTACCGCACTACAGATAACATGATTTTTGTTTAACACATTTAACGAAACTAAGTTACCTTCAAAAAATGACGGGAAGGAATAATGAACTATAATGGCTTTAGATGAAAATGTATAAATGTACAAATTATAATTTATTGATTTATAACTCTATCCCGAGGTCATAGCGGAAAGCGTCATGCACAGTTTACACGCCATCCGCGGCGAGGCCGCCGTATCTAAAAAGGATAAAGTGCAATGCGATATCGTCGTATCGTATCGATTTGTTGTAAAATGCGATCGCTGCCGAGGGCCCCT…	×
Apidae	Tetragonula	Tetragonula davenporti	Tigger	3323	369	1	1	16/16	0.875	CAGAA/CAGTA	DD33D	TA	WIUW01000572.1:24322-27648	CAGAATAACGTTCCAACTTTAAATTTTATTTAAATAAAGTTTAATCTAAATTTTAAATTATTTAAGAAAAATTTGCATTTGCACGTTTTGAAAAGTGATTTAAACACATAATGTTTAACGGTACGAAATGACTAAATACTCGATAAATTTTAAAAACATTAACTATAAACTTTAATAATCTAAGTTAGCGATACATAATGATCAAATGACTTTTTTTCAGGGTAAGTATATTAATTAGACCAAGTGAGATCGTATGATCTATCTCGTGATCTGTTTGTATTATGGAACTGAAATGATCACGATGCCATTATATCCATATTTCGTTTCCTTTTTTTTCTATGTTTTATGCTTTATCTCAACAAATCAATGAGCTTCTATTTTCAACCAATTTTTTCCTTT…	×
Apidae	Tetragonula	Tetragonula davenporti	Tigger	2524	482	1	1	19/19	0.8947	TCCCC/TCCCC	DD33E	TA	WIUW01015214.1:1509-4035	TCCCCACCAATTTTTGGAATTGTGACTATCCCCGCTCTACGTTATCTTATCATGCAGCCGGTATACAT CTCGTACACACAAAACAAGCGATATATGTATATGATACCGATATTAGCTTGGCATCGGTGAAACAGTGGC GCTCTCCCCACTCTTTCTTTTGATGCCTGGAATACACCTCCCCTCTTAACTGACCAGTTTCAGTCCCGAG TGTTGGACAGTTGCGAGGTCACTGCTGTATCGTGTATTACATCAATCCAAATTAATATACTGAACTAATC GATTGACGCAATATTTCTTTAATGACACATTCTGTTTTCAAACACACCGTTCAATAAACCGAGATATGTA TCACCTACCTACGGCTAGATACAATAATTTGTGGACACTTAAGAAG…	×
Apidae	Tetragonula	Tetragonula davenporti	Tc1	1305	101	6	×	14/14	0.8571	CCGGT/CCGGA	DD34D	TA	WIUW01000018.1:104037-105341	CCGGTAAGTTCTGTCCGTTCCGGTTACAACAAGTTTCAAACAAGTATGCGCATTTTCATTTGACGCATATTTGGCTCTCTCTTTTTATCTAGCGGCTTTAACGTCGAGTCTTTGAGGCCACTTGTTTTGAACTTCTCGGCTGTTGCGCGAAGTGTGCACTTGTAGAATAAAGAGAGAGAGAGAGTGTGAATACATACTGACTAAAACGAAGATGATTCACGTTAATATTAAGTGAGACGCGATCGTGTACCCATGGCTACTGATAAAGTTCATTTACGCCACTGTATTTTTGTACGAATTCCAACAAGGAAGAAATGCTACAGAAGCGTGTAGAAATTTATTGAAAGTGTTTGGTGAAGGTACAGTTTCTGATAGAACATGCAGAAGATGGTTCGAAAA…	×
Apidae	Tetragonula	Tetragonula hockingsi	Tigger	3417	198	1	×	22/22	1	CAGTC/CAGTC	DD29D	TA	WIUV01003740.1:965-4385	CAGTCAACCCTCCTATAACGCGATTAATTCGTACCGTGTTATATGGAAACCGCGCTATAAGAAACTCA GATTTAACGCAAACCAGGTTAATTCGTGCCGTGTTATATGGAAACCGTATACCGCGTTATATGGGAACCG CGTGAAGTGAACTCGGATGTAAGTAAAATCACTCGTTAATCAGTTTGATTCGTTCTGCGTTGTATGAAAA TTGCATTCTCAGAGCGTCAAGTTACGGTGCATACGGTCGTGGAAAAAATTTTACAAACACAAAAGGTAAG ATAATATGTTAAGTACAATAAAATTATTTTTATTGAATCGAAGAGTTCATACAAGGAAATGATAAAAAAA ATCAAACTAAAACTAAACTAAACTAAACTAAAAAACTGTTTTCCAA…	×
Apidae	Tetragonula	Tetragonula hockingsi	Tigger	2520	136	6	×	23/23	0.8261	CAGGT/CAGGT	DD31D	TA	WIUV01014445.1:199-2722	CAGGTAACCCTCTTATAACACGGTAAATAAGTTCCTAGAAAATGCTATGTTGCGTGAAACCGTGTTAT ATGAGACCCAGAGCCAGTACAAAAAGGAGGGTTACATTCCGAAAACTTATTAAAAATAAACATATTTTTT TTAATTTCATATAAACAACTTAATTTTTATTAAAAATATAAATGTATGTATAACAGAAAAGAAACAAAAA ATATTATTTTCATTTAATGCGATCTTAATTTAATAAATTTCTTCCTCATCACTGCTCAGTACAATCAAAC GAGAATGTTTTAGACGTAACCGATTCGAAATCAATGTAATGGAAGCTTGGAAGTAATTTTCAATTAAGTA CTGCATATCGACATCATATTTCATCTTTGTCGCTAAAATTTTTCGG…	×
Apidae	Tetragonula	Tetragonula hockingsi	Tigger	3383	369	1	1	16/16	0.875	CAGAA/CAGTA	DD33D	TA	WIUV01000233.1:27903-31289	CAGAATAACGTTCCAACTTTAAATTTTATTTAAATAAAGTTTAATCTAAATTTTAAATTATTTAAGAAAAATTTGCATTTGCACGTTTTGAAAAGTGATTTAAACACATAATGTTTAACGGTACGAAATGACTAAATACTCGATAAATTTTAAAAACATTAACTATAAACTTTAATAATCTAAGTTAGCGATACATAATGATCAAATGACTTTTTTTCAGGGTAAGTATATTAATTAGTATATTAATAAGTATATTACCAAGTGAAATCGTATGATCTATCTCTGTTTGTATCATGGAACTGAAATGATCACGATGCCATTATATCCATATTTCGTTTCCTTTTTTTTCTATGTTTTATGCTTTATCTCAACAAATCAATGAGCTTCTATTTTCAACCA…	×
Apidae	Tetragonula	Tetragonula hockingsi	Tigger	2475	482	1	1	19/19	0.8947	TCCCC/TCCCC	DD33E	TA	WIUV01014603.1:1484-3962	TCCCCACCAATTTTTGGAATTGTGACTATCCCCGCTCTACGTTATCTTATCATGCAGCCGGTATGCAT CTCGTACACGCAAAACAAGCGATATATGTATATGATACCGATATTAGCTTGGCATCGGTGAAACAGTGGC GCTCTCCCCACTCTTTCTTTTGATGCCTGGAATACACCTCCCCTCTTAACTGACCAGTTTCAGTCCCGAG TGTTGGACAGTTGCGAGGTCACTGCTGTATCGTGTATTACATCAATCCAAATTAATATACTGAACTAATC GATTGACGCAATATTTCTTTAATGAACACATTCTGTTTTCAAACACACCGTTCAATAAACCGAGATATGT ATCACCTACCTACGGCTAGATACAATAATTTGTGGACACTTAAGAA…	×
Apidae	Tetragonula	Tetragonula hockingsi	Tc1	1327	101	7	×	14/14	0.8571	CCGGT/CCGGA	DD34D	TA	WIUV01007179.1:3523-4849	CCGGTAAGTTCTGTCCGTTCCGGTTACAACAAGTTTCAAACAAGTATGCGCATTTTCATTTGACGCATATTTGGCTCTCTCTTTTTATCTAGCGGCTTTAACGTCGAGTCTTTGAGGCCACTTGTTTTGAACTTCTCGGCTGTTGCGCGAAGTGTGCACTTGTAGAATAAAGAGAGAGAGAGTGTGAATACATACTGACCTAGCAAATGAACTAAAACGAAGATGATTCACGTTAATATTAAGTGAGACGCGATCGTGTACCCATGGCTACTGATAAAGTTCATTTACGCCACTGTATTTTTGTACGAATTCCAACAAGGAAGAAATGCTACAGAAGCGTGTAGAAATTTATTGAAAGTGTTTGGTGAAGGTACAGTTTCTGATAGAACATGCAGAAGA…	×
Apidae	Tetragonula	Tetragonula mellipes	Tigger	3341	198	1	×	24/24	1	CAGTC/CAGTC	DD29D	TA	WINF01000043.1:17183-20527	CAGTCAACCCTCCTATAACGCGGTACTCATAACGCGGTTTCCGTTCAACAACATTCCATCAACTTAATTGGTTTAAGAAGATTCTCTATAGCATGAATTTATCTATGTGTCAAATTTTTACAGTTGAAATTAACGGGGAATTCCCTTCTTTTTGGTGAAGGTACATCACCATTTTCCAATTTTAGTTATCAAGGAATTCCCCTATAAGCGAAATGATGCGAGATTGTTTACAGTGCTTTGTTTTAATGTTTAAAATAGACCTTATGATTGATTGTTGCGTATTTGCGTGAATTTTTTTATCCAATAGCGCTGCTGAACTTTCGTTGTTTCAACCACCTTTGTCATTAATTTTAAGTGCAACTTAGTAGGAAACTGTCTGTAAATCCGTGCAGACGTACA…	×
Apidae	Tetragonula	Tetragonula mellipes	Tigger	2553	136	12	×	23/23	0.8261	CAGGT/CAGGT	DD32D	TA	WINF01002451.1:1167-3723	CAGGTAACCCTCTTATAACACGGTAGATAAGTTCCTAGAAAATGCTATGTTGCGTGAAACCGTGTTATATGAGACCCAGAGCCAGTACAAAAAGGAGGGTTACATTCCGAAAACTTATTAAAAATAAACATATTTTTTTTAATTTCATATAAACAACTTAATTTTTATTAAAAATATAAATGTATGTATAACAGAAATATTATTTTCATTTAATGCGATCTTAATTTAATAAATTTCTTCCTCATCACTGCTCAGTACAATCAAACGAGAATGTTTTAGACGTAACCGATTCGAAATCAATTAATGTAATGGAAGCTTGGAAGTAATTTTCAATTAAGTACTGCATATCGACATCATATTTCATCTTTGTCGCTAAAATTTTTCGATTGAATGATATCA…	×
Apidae	Tetragonula	Tetragonula mellipes	Tigger	3373	369	2	2	16/16	0.875	CAGAA/CAGTA	DD33D	TA	WINE01000618.1:19391-22767	CAGAATAACGTTCCAACTTTAAATTTTATTTAAATAAAGTTTAATCTAAATTTTAAATTATTTAAGAAAAATTTGCATTTGCACGTTTTGAAAAGTGATTTAAACACATGATGTTTAACGGTACGAAATGACTAAATACTCGATAAATTTTAAAAACATTAACTATAAACTTTAATAATCTAAGTTAGCGATACATAATGATCAAATGACTTTTTTTCAGGGTAAGTATATTAATTAGTATATTAATAAGTATATTACCAAGTGAGATCGTATGATCTATCTCGTGATCTGTTTGTATTATGGAACTGAAATGATCACGATGCCATTATATCCATATTTCGTTTCCTTTTTTTTCTATGTTTTATGCTTTATCTCAACAAATCAATGAGCTTCTATTTT…	×
Apidae	Tetragonula	Tetragonula mellipes	Tigger	2531	482	3	2	19/19	0.8421	TCCCC/TCGCC	DD33E	TA	WINE01015658.1:1428-3962	TCCCCACCAATTTTTGGAATTGTGACTATCCCCGCTCTACGTTATCTTACCACGCAGCCGGTATACATCTCGTACACACACAAAACAAGCGATATATGTATATGATACCGATATTAGCTTGGCATCGGTGAAACAGTGGCGCTCTCCCCACTCTTTCTTTTGATGCCTGGAATACACCTCCCCTCTTAACTGACCAGTTTCAGTCCCGAGTGTTGGACAGTTGCGAGGTCACTGCTGTATCGTGTATTACATCAATCCAAATTAATATACTGAATTAATCGATTGACGCAATATTTCTTTAATGACACATTCTGTTTTCAAACACACCGTTCAATAAACCGAGATATGTATCACCTACCTACGGCTAGATACAATAATTTGTGGACACTTAAGAAGGGC…	×
Apidae	Tetragonula	Tetragonula mellipes	Tc1	1316	101	15	×	14/14	0.8571	CCGGT/CCGGA	DD34D	TA	WINE01000104.1:58413-59728	CCGGTAAGTTCTGTCCGTTCCGGTTACAACAAGTTTCAAACAAGTATGCGCATTTTCATTTGACGCATATTTGGCTCTCTCTTTTTATCTAGCGGCTTTAACGTCGAGTCTTTGAGGCTACTTGTTTTGAACTTCTCGGCTGTTGCGCGAAGTGTGCACTTGTAGAATAAAGAGAGAGAGAGTGTGAATACATACTGACCTAGCAAATGAACTAAAACGAAGATGATTCACGTTAATATTAAGTGAGACGCGATCGTGTACCCATGGCTACTGATAAAGTTCATTTACGCCACTGTATTTTTGTACGAATTCCAACAAGGAAGAAATGCTACAGAAGCGTGTAGAAATTTATTGAAAGTGTTTGGTGAAGGTACAGTTTCTGATAGAACATGCAGAAGA…	×

## Sheet: Sheet2
Group	Class	Order	Distribution of evolution map	name	Family	Length (bp)	ORF(aa)	copy number (>80% identity and > 1000 bp)	copy number of intact Tns	Size(bp) Left/Right	Identity%	TIR end (5 bp)	Catalytic motif	TSD	gb
				Ceratina australensis-MITE	Tc1	239				79/79	91.13	CAGTT/CAGAT	DD30D	TA	SHCU01000168.1:219834-222510
				Melipona quadrifasciata-MITE	Tc1	663				25/25	88	CAGTC/CAGTC	DD30D	TA	LIRP01008264.1:1026-3364
				Nomia melanderi-MITE	Tc1	336				24/24	87.5	CAGTC/TAGTC	DD30D	TA	REGV01000901.1:510147-512251
				Ceratina calcarata-MITE	Tc1	676				114/114	94.73	CAGGG/GAGGG	DD32D	TA	LSNX01032230.1:39983-42077
				Lasioglossum albipes-MITE	Tc1	499				25/25	84	CAGGG/CAGGG	DD34E	TA	ANOB01005573.1:3093-6438
				Ceratina australensis-MITE	Tc1	552				31/31	87.09	CACTG/CACTA	DD38E	TA	SHCU01000103.1:71312-73693
				Lasioglossum albipes-MITE	Tc1	551				27/27	100	CACTA/CACTA	DD38E	TA	ANOB01040874.1:10226-12253
				Apis cerana cerana-MITE	Tc1	747				9/9	88.88	TTCCC/CTCCC	DD39D	TA	JPYL01015387.1:948-3116
				Apis cerana japonica-MITE1	Tc1	819				21/21	85.71	CTCCC/CTCTC	DD39D	TA	BDUG01000064.1:131148-133233
				Apis cerana japonica-MITE2	Tc1	740				8/8	87.5	TTCCC/CTCCC	DD39D	TA	BDUG01002313.1:112803-115045
				Apis cerana-MITE1	Tc1	752				9/9	88.88	TTCCC/CTCCC	DD39D	TA	JANR01000012.1:813591-815782
				Apis cerana-MITE2	Tc1	816				20/20	85	CTCCC/CTCTC	DD39D	TA	JANR01000110.1:126223-128389
				Bombus terrestris-MITE	Tc1	925				141/141	97.16	CAGGG/CAAGG	DD41D	TA	AELG01004816.1:4006-8410
				Eufriesea mexicana-MITE	Tc1	664				37/37	86.48	CAGGG/CAGGA	DD41D	TA	LLKC01030245.1:26205-28313
				Habropoda laboriosa-MITE	Tc1	457				137/137	97.81	CATGA/CATGA	DD41D	TA	LHQN01011215.1:1525-3676
				Lasioglossum albipes-MITE	Tc1	468				34/34	97.05	CAGGG/CAGGG	DD41D	TA	ANOB01030066.1:4554-6778
				Megachile rotundata-MITE	Tc1	646				29/29	93.1	CAGGG/CAGGG	DD37D	TA	AFJA01003112.1:63469-67822
				Colletes gigas	Tc1	661	67			124/124	0.9032	CAGGG/CAGAG	DD34D	TA
				Tetragonula davenporti	Tc1	938	107	257	×	36/36	94.44	CTCCC/CTCCC	DD39D	TA
				Tetragonula hockingsi	Tc1	924	107	214	×	36/36	91.67	CTCCC/CTCCC	DD39D	TA
				Tetragonula carbonaria	Tc1	884	100<	257	×	33/33	93.55	CTCCC/CTGCC	DD39D	TA
				Tetragonula mellipes	Tc1	921	100<	440	×	24/24	95.83	CTCTC/CTCCC	DD39D	TA
				Tetragonula clypearis	Tc1	901	100<	272	×	32/32	87.5	CTCTC/CTCCC	DD39D	TA
