# Supplementary material
Source: Preprints.org preprint supplement (doi:10.20944/preprints202108.0095.v1)
Supplement: Supplementary file 2 [file Table S1 The access number of reference pogo and Tc1 elements.xlsx]

## Sheet: Sheet1
	Name	Species	accession numbers
DD30D_pogo_S20478_ Dm	pogo	Drosophila melanogaster	S20478
DD31D_Lemi1_AC006161_At	Lemi1	Arabidopsis thaliana	AC006161
DD32D_Tigger1_RepBase_Hs	Tigger1	Homo sapiens	RepBase
DD34D_Hsmar1_U52077_Hs	Hsmar1	Homo sapiens	U52077
DD34D_Hsmar2_U49974_Hs	Hsmar2	Homo sapiens	U49974
DD34D_Mariner_AAC52011_Hs	Mariner	Homo sapiens	AAC52011
DD34D_Mos_X78906_Dm	Mos	Drosophila mauritiana	X78906
DD34E_Topi_AAD03792.1_Ag	Topi	Anopheles gambiae	AAD03792.1
DD34E_Quetzal_AAB02109_Aa	Quetzal	Anopheles albimanus	AAB02109
DD35E_TR_Dr	Traveler	Danio rerio	CZQB01064057.1
DD35E_TR_Om	Traveler	Oncorhynchus mykiss	MSJN01002183.1
DD35E_TR_Tf	Traveler	Tachysurus fulvidraco	REGT01000614.1
DD35E_IS630_X05955_Ss	IS630	Shigella sonnei	X05955
DD36E_IC_Sm	Incomer	Stegodyphus mimosarum	KFM64688.1
DD36E_IC_Ln	Incomer	Lasius niger	KMQ82439.1
DD36E_IC_Rm	Incomer	Rhinella marina	ONZH01022299.1
DD37D_AAN06610.1_Bm		Bombyx mori	AAN06610.1
DD37D_AB054644_Sp		Sarcophaga peregrina	AB054644
DD37D_maT_APL98300.1_Bt	maT	Bactrocera tryoni	APL98300.1
DD37E_JXUT01105677.1_Ap_Tnp	Tnp	Apostichopus parvimensis	JXUT01105677.1
DD37E_JZLH010896591.1_Et_Tnp	Tnp	Eucidaris tribuloides	JZLH010896591.1
DD37E_LNIX01000055.1_FS_Tnp	Tnp	Folsomia candida	LNIX01000055.1
DD37E_TRT_Dr	TRT	Danio rerio	chr2 13613290 13614851
DD37E_TRT_Hb	TRT	Haplochromis burtoni	AFNZ01059715.1
DD37E_TRT_Mz	TRT	Maylandia zebra	AGTA02022835.1
DD37E_TRT_Xt	TRT	Xenopus (Silurana) tropicalis	AAMC02022243.1
DD37E_AF37799_Aa	Ae	Aedes epactius	AF378000
DD37E_AF37800_Ae	Ag	Anopheles gambiae	AF378002
DD37E_AF378002_Ag	Pe	Phyllostachys edulis	ADP24264.1
DD38E_IT_Hh	Intruder	Hucho hucho	QNTS01000693.1
DD38E_IT_Rm	Intruder	Rhinella marina	ONZH01027030.1
DD38E_IT_Sl	Intruder	Seriola lalandi	MAII01000428.1
DD39D_ADP24264.1_Pe		Phyllostachys edulis	ADP24264.1
DD39D_AAX51974.1_Ps		Pisum sativu	AAX51974.1
DD39D_Soymar1_AF078934_Gm	Soymar1	Glycine max	AF078934
DD41D_ADD24484.1_Ls	VS	Bactrocera tryoni	ADD24484.1
DD41D_AAK61417.1_Cr	VS	Ceratitis rosa	AAK61417.1
DD41D_JAC51026.1_Bd	VS	Bactrocera dorsalis	JAC51026.1
IS630A_ISXo7_AY035401	IS630	Xanthomonas oryzae	AY035401
IS630B_IS642_NC_002570	IS630	Bacillus halodurans	NC_002570
IS630C_X05955	IS630	Shigella sonnei	X05955
IS630D_ISMma8_NC_003901	IS630	Methanosarcina mazei	NC_003901
IS630E_ISPlu19_BX470251	IS630	Photorhabdus luminescens	BX470251
IS630F_IS895_M67475	IS630	Nostoc sp.PCC	M67475
IS630G_ISMae23_NC_010296	IS630	Microcystis aeruginosa	NC_010296
IS630H_ISMno21_CP001350	IS630	Methylobacterium nodulans	CP001350
IS630I_ISNma6_CP001932	IS630	Natrialba magadii	CP001932
IS630J_ISRm2011-2_U22370	IS630	Rhizobium meliloti	U22370
IS630K_ISHsp2_JX569340	IS630	Halomonas sp. ZM3	JX569340
IS630_ISAcma27_NC_009925	IS630	Acaryochloris marina	NC_009925
IS630_ISAcma32_NC_009925	IS630	Acaryochloris marina	NC_009925
IS630_ISC1048_NC_002754	IS630	Saccharolobus solfataricus	NC_002754
IS630_ISMma17_NC_003901	IS630	Methanosarcina mazei	NC_003901
IS630_ISWpi10	IS630	Wolbachia pipientis	×
IS630_ISAcma28_NC_009925	IS630	Acaryochloris marina	NC_009925
IS630_ISA1083-2_AE001010	IS630	Archaeoglobus fulgidus	AE001010
IS630_ISC1078_NC_002754	IS630	Saccharolobus solfataricus	NC_002754
TP36_Sc	IS630	Streptomyces clavuligerus	ABJH01000156.1
TP36_Cw	IS630	Crocosphaera watsonii	AADV02000006.1
TP36_Gb	IS630	Gemmata obscuriglobus	ABGO01000166.1
TP36_Ma	IS630	Microcystis aeruginosa	AP009552.1
TP36_Mc	IS630	Microcoleus chthonoplastes	ABRS01000099.1
TP36_Rb	IS630	Rhodopirellula baltica	BX294149.1
TP36_Ss	IS630	Streptomyces sp	ABJF01000014.1
Zator_BF	IS630	Hydra magnipapillata	ABRM01009058.1
Zator_HM	IS630	Aedes aegypti	AAGE02018736.1
Zator_AA	IS630	Xanthomonas oryzae	AY035401
