# Supplementary material
Source: Preprints.org preprint supplement (doi:10.20944/preprints202108.0095.v1)
Supplement: Supplementary file 3 [file Table S2 EF1-a Hsc70-4 and tub3 Accession Number.xlsx]

## Sheet: Sheet1
	Accession numbers
Species	EF1-a	Hsc70-4	tub3
Apis mellifera	AADG06005527.1	NC_037638.1	AADG06004955.1
Apis mellifera carnica	JACDQX010000006.1	JACDQX010000001.1	JACDQX010000008.1
Apis mellifera caucasica	JACDQY010000086.1	JACDQY010000014.1	JACDQY010000127.1
Apis mellifera mellifera	QFDB01000005.1	QFDB01000001.1	QFDB01000004.1
Bombus bifarius	JAAQOX010000077.1	JAAQOX010000218.1	JAAQOX010000100.1
Bombus impatiens	AEQM02008676.1	AEQM02001076.1	AEQM02003956.1
Bombus terrestris	AELG01005016.1	AELG01002684.1	AELG01003671.1
Bombus vancouverensis nearcticus	JAAQRE010000026.1	JAAQRE010000010.1	JAAQRE010000107.1
Bombus vosnesenskii	JAAQVK010000116.1	JAAQVK010000086.1	JAAQVK010000025.1
Dufourea novaeangliae	LGHO01000577.1	LGHO01000232.1	LGHO01001542.1
Eufriesea mexicana	LLKC01007097.1	LLKC01008991.1	LLKC01008725.1
Lasioglossum albipes	ANOB01027197.1	ANOB01012439.1	ANOB01008704.1
Lepidotrigona ventralis hoosana	NIPQ01093128.1	NIPQ01091716.1	NIPQ01120207.1
Melipona quadrifasciata	LIRP01006151.1	LIRP01015598.1	LIRP01024053.1
Osmia bicornis bicornis	MPJT01000079.1	MPJT01000686.1	MPJT01000039.1
Osmia lignaria	JAAOZW010000042.1	JAAOZW010000107.1	JAAOZW010000055.1
Tetragonula carbonaria	WIUU01008880.1	WIUU01003129.1	WIUU01001254.1
Tetragonula clypearis	WIUT01002255.1	WIUT01006272.1	WIUT01010113.1
Tetragonula davenporti	WIUW01008704.1	WIUW01004644.1	WIUW01001253.1
Tetragonula hockingsi	WIUV01008248.1	WIUV01002498.1	WIUV01000209.1
Tetragonula mellipes	WINF01009479.1	WINE01004263.1	WINF01011570.1
