# Supplementary material
Source: Preprints.org preprint supplement (doi:10.20944/preprints202108.0095.v1)
Supplement: Supplementary file 5 [file Table S4 distance and Divergence time.xls]

## Sheet: MatrixOutput
DD30D
Species 1	Species 2	TEs	EF1a	Hsc70-4	Tub3	Divergence time
Dufourea novaeangliae	Osmia lignaria	0.00350717	0.154255	0.155905	0.145017	110
Dufourea novaeangliae	Eufriesea mexicana	0.0435333	0.137774	0.175327	0.255976	110
Eufriesea mexicana	Osmia lignaria	0.0466824	0.163764	0.170101	0.2488	110
Eufriesea mexicana	Tetragonula clypearis	0.128667	0.11691	0.145074	0.271365	78.8
Osmia lignaria	Tetragonula clypearis	0.132848	0.152148	0.164254	0.153657	110
Dufourea novaeangliae	Tetragonula clypearis	0.13357	0.144298	0.173859	0.156506	110
DD33D
Species 1	Species 2	TEs	EF1a	Hsc70-4	Tub3	Divergence time
Lepidotrigona ventralis hoosana	Tetragonula hockingsi	0.00964691	0.0282712	0.0159162	0.0179866	49
Lepidotrigona ventralis hoosana	Tetragonula carbonaria	0.0100931	0.0282712	0.0152468	0.0170628	49
Lepidotrigona ventralis hoosana	Tetragonula mellipes	0.0100931	0.0317398	0.0145856	0.0170628	49
Lepidotrigona ventralis hoosana	Tetragonula davenporti	0.0101009	0.0282712	0.0145779	0.0170628	49
Lepidotrigona ventralis hoosana	Tetragonula clypearis	0.0110034	0.0406112	0.0268778	0.0198065	49
Lepidotrigona ventralis hoosana	Melipona quadrifasciata	0.0252527	0.047579	0.0414422	0.0462122	78
Melipona quadrifasciata	Tetragonula hockingsi	0.0273078	0.0492695	0.0419921	0.0433673	78
Melipona quadrifasciata	Tetragonula carbonaria	0.0277941	0.0492695	0.0419921	0.0423816	78
Melipona quadrifasciata	Tetragonula mellipes	0.0277941	0.0529098	0.0407467	0.0423816	78
Melipona quadrifasciata	Tetragonula davenporti	0.0278183	0.0492695	0.0407264	0.0423816	78
Melipona quadrifasciata	Tetragonula clypearis	0.0283127	0.0568761	0.05128	0.0433407	78
DD34D-cluster1
Species 1	Species 2	TEs	EF1a	Hsc70-4	Tub3	Divergence time
Bombus bifarius	Lasioglossum albipes	0.0434406	0.0594328	0.119703	0.188419	110
Bombus vosnesenskii	Lasioglossum albipes	0.0441235	0.0612688	0.119734	0.188419	110
Bombus vancouverensis nearcticus	Lasioglossum albipes	0.0460441	0.0602488	0.119703	0.188419	ND
Lasioglossum albipes	Osmia lignaria	0.0478704	0.0517166	0.110291	0.179114	110
Bombus impatiens	Lasioglossum albipes	0.0496718	0.0594328	0.120107	0.191492	110
Bombus bifarius	Osmia lignaria	0.0528309	0.0534761	0.0907558	0.163651	110
Bombus vosnesenskii	Osmia lignaria	0.053547	0.0552018	0.0907326	0.163651	110
Bombus vancouverensis nearcticus	Osmia lignaria	0.0548924	0.0542518	0.0907558	0.163651	ND
Bombus terrestris	Lasioglossum albipes	0.0589595	0.0633454	0.124122	0.183844	110
Bombus impatiens	Osmia lignaria	0.0593966	0.0534761	0.0921191	0.166452	110
Bombus terrestris	Osmia lignaria	0.0717639	0.0550463	0.0952227	0.170683	110
DD34D-cluster2
Species 1	Species 2	TEs	EF1a	Hsc70-4	Tub3	Divergence time
Apis mellifera carnica	Osmia bicornis bicornis	0.158359	0.174184	0.268882	0.179623	110
Apis mellifera caucasica	Osmia bicornis bicornis	0.158359	0.17662	0.260674	0.17822	110
Apis mellifera mellifera	Osmia bicornis bicornis	0.158359	0.174184	0.262882	0.173796	110
Apis mellifera	Osmia bicornis bicornis	0.179454	0.174184	0.260674	0.17822	110
